# Supplementary material
Source: ML conference proceedings conference paper supplement (https://www.ecva.net/papers/eccv_2020/papers_ECCV/html/123610409_ECCV_2020_paper.php)
Supplement: Supplementary file 9 [file 123610409-supp.zip]

Archive with 23 entries (21 files):
- 2568-supp/
- 2568-supp/main.bbl
- 2568-supp/table_officehome.tex
- 2568-supp/table_office31.tex
- 2568-supp/symbols.tex
- 2568-supp/splncs04.bst
- 2568-supp/reproducibility.tex
- 2568-supp/pseudoalgorithm.tex
- 2568-supp/main.tex
- 2568-supp/llncs.cls
- 2568-supp/history.txt
- 2568-supp/egbib.bib
- 2568-supp/decrease_table.tex
- 2568-supp/README.txt
- 2568-supp/2568-supp.pdf
- 2568-supp/img/
- 2568-supp/img/unk.pdf
- 2568-supp/img/os.pdf
- 2568-supp/img/lambda21.pdf
- 2568-supp/img/lambda12.pdf
- 2568-supp/img/lambda1122.pdf
- 2568-supp/img/iter.pdf
- 2568-supp/img/hos.pdf
