# Supplementary material
Source: ML conference proceedings conference paper supplement (https://www.ecva.net/papers/eccv_2020/papers_ECCV/html/123610409_ECCV_2020_paper.php)
Supplement: Supplementary file 9 [file 123610409-supp.zip › 2568-supp/decrease_table.tex]

\resizebox{\textwidth}{!}{
\begin{tabular}{l@{~~~~}ccccc cccc}
\hline
       \multicolumn{9}{c}{\textbf{Office-Home (Avg.)}}        \\
       \hline
       & \multicolumn{4}{c|}{40 known classes} & \multicolumn{4}{c}{25 known classes}\\ \hline
       & OS & OS* & UNK & \multicolumn{1}{c|}{\textbf{\underline{HOS}}} & OS & OS* & UNK & \multicolumn{1}{c}{\textbf{\underline{HOS}}}\\
\hline

STA\textsubscript{sum}\cite{liu2019separate} & 53.9$\pm$1.7 & 53.5$\pm$1.7 & 71.1$\pm$3.0 & \multicolumn{1}{c|}{60.1$\pm$1.7} & 63.5$\pm$2.6 & 63.3$\pm$3.3 & 65.1$\pm$2.2 & \multicolumn{1}{c}{61.4$\pm$1.5}\\
OSBP\cite{saito2018open} & 56.3$\pm$1.6 & 55.9$\pm$1.6  & 71.8$\pm$3.6 & \multicolumn{1}{c|}{\textbf{62.3$\pm$1.8}} & 61.4$\pm$2.5 & 61.0$\pm$2.8 & 64.2$\pm$2.8 & \multicolumn{1}{c}{62.0$\pm$2.8}\\
\textbf{ROS} & 56.2$\pm$1.2 & 55.9$\pm$1.2 & 71.1$\pm$2.8 & \multicolumn{1}{c|}{62.1$\pm$1.8}  & 59.9$\pm$1.9 & 59.5$\pm$1.9 & 70.4$\pm$4.0 & \multicolumn{1}{c}{\textbf{63.9$\pm$2.7}} \\
\hline
& \multicolumn{4}{c|}{10 known classes} & \multicolumn{4}{c}{5 known classes}\\ \hline
 & OS & OS* & UNK & \multicolumn{1}{c|}{\textbf{\underline{HOS}}} & OS & OS* & UNK & \multicolumn{1}{c}{\textbf{\underline{HOS}}}\\
 \hline
 STA\textsubscript{sum}\cite{liu2019separate} & 72.5$\pm$5.8 & 73.8$\pm$6.6 & 61.4$\pm$14.5 & \multicolumn{1}{c|}{62.5$\pm$8.6} & 74.4$\pm$2.8 & 78.9$\pm$6.3 & 52.1$\pm$17.7 & \multicolumn{1}{c}{57.5$\pm$12.3}\\
 OSBP\cite{saito2018open} & 73.6$\pm$5.7 & 76.2$\pm$5.7 & 47.9$\pm$4.8 & \multicolumn{1}{c|}{58.0$\pm$5.1} & 72.3$\pm$4.9 & 82.5$\pm$5.6 & 21.5$\pm$1.6 & \multicolumn{1}{c}{33.3$\pm$2.6}\\
 \textbf{ROS} & 69.9$\pm$5.2 & 68.9$\pm$5.5 & 78.9$\pm$2.9 & \multicolumn{1}{c|}{\textbf{73.0$\pm$4.4}} & 73.4$\pm$6.7 & 71.1$\pm$7.6 & 86.3$\pm$2.7 & \multicolumn{1}{c}{\textbf{77.2$\pm$5.9}} \\
 
\hline
\end{tabular}
}
