# Supplementary material
Source: ML conference proceedings conference paper supplement (https://www.ecva.net/papers/eccv_2020/papers_ECCV/html/123610409_ECCV_2020_paper.php)
Supplement: Supplementary file 9 [file 123610409-supp.zip › 2568-supp/egbib.bib]

@inproceedings{he2016deep,
  title={Deep residual learning for image recognition},
  author={He, Kaiming and Zhang, Xiangyu and Ren, Shaoqing and Sun, Jian},
  booktitle={CVPR},
  year={2016}
}

@article{simonyan2014very,
  title={Very deep convolutional networks for large-scale image recognition},
  author={Simonyan, Karen and Zisserman, Andrew},
  journal={Preprint arXiv:1409.1556},
  year={2014}
}


@inproceedings{saenko2010adapting,
  title={Adapting visual category models to new domains},
  author={Saenko, Kate and Kulis, Brian and Fritz, Mario and Darrell, Trevor},
  booktitle={ECCV},
  year={2010}
}

@inproceedings{venkateswara2017deep,
  title={Deep hashing network for unsupervised domain adaptation},
  author={Venkateswara, Hemanth and Eusebio, Jose and Chakraborty, Shayok and Panchanathan, Sethuraman},
  booktitle={CVPR},
  year={2017}
}

@article{ioffe2015batch,
  title={Batch normalization: Accelerating deep network training by reducing internal covariate shift},
  author={Ioffe, Sergey and Szegedy, Christian},
  journal={Preprint arXiv:1502.03167},
  year={2015}
}

@inproceedings{deng2009imagenet,
  title={Imagenet: A large-scale hierarchical image database},
  author={Deng, Jia and Dong, Wei and Socher, Richard and Li, Li-Jia and Li, Kai and Fei-Fei, Li},
  booktitle={CVPR},
  year={2009}
}


@inproceedings{liu2019separate,
  title={Separate to adapt: Open set domain adaptation via progressive separation},
  author={Liu, Hong and Cao, Zhangjie and Long, Mingsheng and Wang, Jianmin and Yang, Qiang},
  booktitle={CVPR},
  year={2019}
}


@inproceedings{saito2018open,
  title={Open set domain adaptation by backpropagation},
  author={Saito, Kuniaki and Yamamoto, Shohei and Ushiku, Yoshitaka and Harada, Tatsuya},
  booktitle={ECCV},
  year={2018}
}

@inproceedings{you2019universal,
  title={Universal domain adaptation},
  author={You, Kaichao and Long, Mingsheng and Cao, Zhangjie and Wang, Jianmin and Jordan, Michael I},
  booktitle={CVPR},
  year={2019}
}


@inproceedings{feng2019attract,
  title={Attract or Distract: Exploit the Margin of Open Set},
  author={Feng, Qianyu and Kang, Guoliang and Fan, Hehe and Yang, Yi},
  booktitle={CVPR},
  year={2019}
}


@inproceedings{gong2012geodesic,
  title={Geodesic flow kernel for unsupervised domain adaptation},
  author={Gong, Boqing and Shi, Yuan and Sha, Fei and Grauman, Kristen},
  booktitle={CVPR},
  year={2012}
}

@article{visda2017,
  author    = {Xingchao Peng and
               Ben Usman and
               Neela Kaushik and
               Judy Hoffman and
               Dequan Wang and
               Kate Saenko},
  title     = {VisDA: The Visual Domain Adaptation Challenge},
  journal={Preprint arXiv:1710.06924},
  year      = {2017}
}

@inproceedings{carlucci2019domain,
author = {Carlucci, Fabio M. and D'Innocente, Antonio and Bucci, Silvia and Caputo, Barbara and Tommasi, Tatiana},
title = {Domain Generalization by Solving Jigsaw Puzzles},
booktitle = {CVPR},
year = {2019}
} 

@inproceedings{xu2019larger,
author = {Xu, Ruijia and Li, Guanbin and Yang, Jihan and Lin, Liang},
title = {Larger Norm More Transferable: An Adaptive Feature Norm Approach for Unsupervised Domain Adaptation},
booktitle = {ICCV},
year = {2019}
}

@ARTICLE{xu2019self-supervised,
author={J. {Xu} and L. {Xiao} and A. M. {López}},
journal={IEEE Access},
title={Self-Supervised Domain Adaptation for Computer Vision Tasks},
year={2019},
volume={7},
pages={156694-156706},
}

@inproceedings{golan2018deep,
  title={Deep anomaly detection using geometric transformations},
  author={Golan, Izhak and El-Yaniv, Ran},
  booktitle={NeurIPS},
  pages={9758--9769},
  year={2018}
}

@inproceedings{Bergman2020Classification-Based,
title={Classification-Based Anomaly Detection for General Data},
author={Liron Bergman and Yedid Hoshen},
booktitle={ICLR},
year={2020}
}

@inproceedings{hendrycks2019selfsupervised,
  title={Using Self-Supervised Learning Can Improve Model Robustness and Uncertainty},
  author={Dan Hendrycks and Mantas Mazeika and Saurav Kadavath and Dawn Song},
  booktitle={NeurIPS},
  year={2019}
}
