# Supplementary material
Source: ML conference proceedings conference paper supplement (https://www.ecva.net/papers/eccv_2020/papers_ECCV/html/123610409_ECCV_2020_paper.php)
Supplement: Supplementary file 9 [file 123610409-supp.zip › 2568-supp/main.bbl]

\begin{thebibliography}{10}
\providecommand{\url}[1]{\texttt{#1}}
\providecommand{\urlprefix}{URL }
\providecommand{\doi}[1]{https://doi.org/#1}

\bibitem{Bergman2020Classification-Based}
Bergman, L., Hoshen, Y.: Classification-based anomaly detection for general
  data. In: ICLR (2020)

\bibitem{carlucci2019domain}
Carlucci, F.M., D'Innocente, A., Bucci, S., Caputo, B., Tommasi, T.: Domain
  generalization by solving jigsaw puzzles. In: CVPR (2019)

\bibitem{deng2009imagenet}
Deng, J., Dong, W., Socher, R., Li, L.J., Li, K., Fei-Fei, L.: Imagenet: A
  large-scale hierarchical image database. In: CVPR (2009)

\bibitem{feng2019attract}
Feng, Q., Kang, G., Fan, H., Yang, Y.: Attract or distract: Exploit the margin
  of open set. In: CVPR (2019)

\bibitem{golan2018deep}
Golan, I., El-Yaniv, R.: Deep anomaly detection using geometric
  transformations. In: NeurIPS. pp. 9758--9769 (2018)

\bibitem{he2016deep}
He, K., Zhang, X., Ren, S., Sun, J.: Deep residual learning for image
  recognition. In: CVPR (2016)

\bibitem{hendrycks2019selfsupervised}
Hendrycks, D., Mazeika, M., Kadavath, S., Song, D.: Using self-supervised
  learning can improve model robustness and uncertainty. In: NeurIPS (2019)

\bibitem{ioffe2015batch}
Ioffe, S., Szegedy, C.: Batch normalization: Accelerating deep network training
  by reducing internal covariate shift. Preprint arXiv:1502.03167  (2015)

\bibitem{liu2019separate}
Liu, H., Cao, Z., Long, M., Wang, J., Yang, Q.: Separate to adapt: Open set
  domain adaptation via progressive separation. In: CVPR (2019)

\bibitem{visda2017}
Peng, X., Usman, B., Kaushik, N., Hoffman, J., Wang, D., Saenko, K.: Visda: The
  visual domain adaptation challenge. Preprint arXiv:1710.06924  (2017)

\bibitem{saenko2010adapting}
Saenko, K., Kulis, B., Fritz, M., Darrell, T.: Adapting visual category models
  to new domains. In: ECCV (2010)

\bibitem{saito2018open}
Saito, K., Yamamoto, S., Ushiku, Y., Harada, T.: Open set domain adaptation by
  backpropagation. In: ECCV (2018)

\bibitem{simonyan2014very}
Simonyan, K., Zisserman, A.: Very deep convolutional networks for large-scale
  image recognition. Preprint arXiv:1409.1556  (2014)

\bibitem{venkateswara2017deep}
Venkateswara, H., Eusebio, J., Chakraborty, S., Panchanathan, S.: Deep hashing
  network for unsupervised domain adaptation. In: CVPR (2017)

\bibitem{xu2019self-supervised}
{Xu}, J., {Xiao}, L., {López}, A.M.: Self-supervised domain adaptation for
  computer vision tasks. IEEE Access  \textbf{7},  156694--156706 (2019)

\bibitem{xu2019larger}
Xu, R., Li, G., Yang, J., Lin, L.: Larger norm more transferable: An adaptive
  feature norm approach for unsupervised domain adaptation. In: ICCV (2019)

\bibitem{you2019universal}
You, K., Long, M., Cao, Z., Wang, J., Jordan, M.I.: Universal domain
  adaptation. In: CVPR (2019)

\end{thebibliography}
