# Supplementary material
Source: ML conference proceedings conference paper supplement (https://www.ecva.net/papers/eccv_2020/papers_ECCV/html/123610409_ECCV_2020_paper.php)
Supplement: Supplementary file 9 [file 123610409-supp.zip › 2568-supp/pseudoalgorithm.tex]

\begin{algorithm}[b!]
\caption{Compute normality score and Generate $\sD_t^{knw}$ \& $\sD_t^{unk}$}
\label{alg:score}
\begin{algorithmic}
\Require 
\State Trained networks $E$ and $R_1$
\State Target dataset $\sD_t=\{\bx^t_j\}_{j=1}^{N_t}$
\Ensure
\State Known target dataset $\sD_t^{knw}=\{\bx_j^{t,knw}\}_{j=1}^{N_{t,knw}}$
\State Unknown target dataset $\sD_t^{unk}=\{\bx_j^{t,unk}\}_{j=1}^{N_{t,unk}}$
\State 
\Procedure{getRotationScore}{$\bz$,$i$}
\State $\textbf{o}=zeros(|\sC_s|)$ \# vector of $|\sC_s|$ zeros
\For{\textbf{each} $k$ \textbf{in} $\{1,...,|\sC_s|\}$}
\State $[\textbf{o}]_{k}=[\bz]_{k\times4+i}$ \# $[\textbf{a}]_b$ indicated the $b$-th element of vector $\textbf{a}$
\EndFor
\State \textbf{return} $\textbf{o}$
\EndProcedure
\Procedure{getEntropyScore}{$\bz$}
\State \textbf{return} $\bz \cdot \log(\bz)/\log(|\sC_s|)$
\EndProcedure
\Procedure{getNormalityScore}{$E$,$R_1$,$\sD_t$}
\For{\textbf{each} $\bx^t_j$ \textbf{in} $\sD_t$}
\State Initialize: $h=\{\}$,  $\textbf{o}=zeros(|\sC_s|)$ 
\For{\textbf{each} $i$ \textbf{in} $\{1,...,4\}$}
\State $\tilde{\bx}_j = rot90(\bx_j,i)$
\State $\bz_j=\text{softmax}\big(R_1(E(\bx_j)||E(\tilde{\bx}_j))\big)$
\State $h \leftarrow getEntropyScore(\bz_j)$
\State $o\mathrel{+}=getRotationScore(\bz_j,i)$ \# element-wise sum of vectors
\EndFor
\State $h = mean(h)$
\State $o = max(\textbf{o})$
\State $\mathcal{N} \leftarrow \eta_j = max(o,1-h)$
\EndFor
\State \textbf{return} $\mathcal{N}$
\EndProcedure
\State
\Procedure{Main}{ }
\State Initialize: $\sD_t^{knw}=\{\}$, $\sD_t^{unk}=\{\}$
\State $\sA = getNormalityScore(E,R_1,\sD_t)$
\For{\textbf{each} $(\bx_j,\eta_j)$ \textbf{in} $(\sD_t,\mathcal{N})$}
\If{$\eta_j \ge mean(\mathcal{N})$}
\State $\sD_t^{knw} \leftarrow \bx_j$
\Else
\State $\sD_t^{unk} \leftarrow \bx_j$
\EndIf
\EndFor
\EndProcedure
\end{algorithmic}
\end{algorithm}
