# Supplementary material
Source: ML conference proceedings conference paper supplement (https://www.ecva.net/papers/eccv_2020/papers_ECCV/html/123610409_ECCV_2020_paper.php)
Supplement: Supplementary file 9 [file 123610409-supp.zip › 2568-supp/reproducibility.tex]

\renewcommand{\thetable}{3s}
\begin{table}[t]
\centering
\caption{Reported vs reproduced OS accuracy (\%) averaged over three runs on all the sub-domains of  Office-31 and Office-Home with the indicated backbones.}
\resizebox{\textwidth}{!}{
\begin{tabular}{l@{~~~} cccccc ccc cccccc}
\hline
 \multicolumn{15}{c}{\textbf{Reproducibility Study}} \\
 \hline
 \multicolumn{6}{c|}{Office-31 (ResNet-50)} & \multicolumn{3}{c|}{Office-31 (VGGNet)} & \multicolumn{6}{c}{Office-Home  (ResNet-50)}\\
 \hline
  \multicolumn{3}{c|}{STA\textsubscript{sum}} & \multicolumn{3}{c|}{UAN}  & \multicolumn{3}{c|}{OSBP} & \multicolumn{3}{c|}{STA\textsubscript{sum}} & \multicolumn{3}{c}{UAN}\\

OS\textsubscript{reported} & OS\textsubscript{ours} & \multicolumn{1}{c|}{gap} & OS\textsubscript{reported} & OS\textsubscript{ours}  & \multicolumn{1}{c|}{gap} & OS\textsubscript{reported} & OS\textsubscript{ours}  & \multicolumn{1}{c|}{gap} & OS\textsubscript{reported} & OS\textsubscript{ours}  & \multicolumn{1}{c|}{gap} & OS\textsubscript{reported} & OS\textsubscript{ours}  & \multicolumn{1}{c}{gap}\\
 \hline

\multicolumn{1}{c}{92.9} &  \multicolumn{1}{c}{90.6$\pm$1.8} & \multicolumn{1}{c|}{\textbf{2.3}} &  \multicolumn{1}{c}{89.2} &   \multicolumn{1}{c}{87.9$\pm$0.03} & \multicolumn{1}{c|}{\textbf{1.3}} &  \multicolumn{1}{c}{89.1} &  \multicolumn{1}{c}{84.2 $\pm$0.4} & \multicolumn{1}{c|}{\textbf{4.9}} & \multicolumn{1}{c}{69.5} &   \multicolumn{1}{c}{63.3$\pm$2.1} & \multicolumn{1}{c|}{\textbf{6.2}}  &  \multicolumn{1}{c}{77.0} & \multicolumn{1}{c}{75.1 $\pm$0.2} & \multicolumn{1}{c}{\textbf{1.9}}\\

\hline
\end{tabular}
}
\hspace{-2cm}
\label{tab:reproducibility} 
\end{table}
