# Supplementary material
Source: ML conference proceedings conference paper supplement (https://www.ecva.net/papers/eccv_2020/papers_ECCV/html/123610409_ECCV_2020_paper.php)
Supplement: Supplementary file 9 [file 123610409-supp.zip › 2568-supp/table_office31.tex]

\renewcommand{\thetable}{2s}
\begin{table}[t]
\centering
\caption{Office-31}
\resizebox{\textwidth}{!}{
\begin{tabular}{l@{~~~~~}cc cccc cccc cccc  }
\hline

&       \multicolumn{12}{c}{\textbf{ Office-31 ResNet-50}}        \\
\hline
& & & & \multicolumn{4}{c|}{A $\rightarrow$ W } & \multicolumn{4}{c}{A $\rightarrow$ D } 
 \\
     & & & & OS & OS* & UNK & \multicolumn{1}{c|}{\textbf{\underline{HOS}}} & OS & OS* & UNK &  \multicolumn{1}{c}{\textbf{\underline{HOS}}}\\
     
\hline
\multicolumn{1}{c}{STA\textsubscript{sum}} & \multirow{2}{*}{\cite{liu2019separate}} & & & 89.0$\pm$4.0 & 92.1$\pm$4.6 & 58.0$\pm$5.7 & \multicolumn{1}{c|}{71.0$\pm$4.0} & 90.8$\pm$2.6 & 95.4$\pm$2.8 & 45.5$\pm$1.6 & \multicolumn{1}{c}{61.6$\pm$1.7} \\
\multicolumn{1}{c}{STA\textsubscript{max}} & & & & 85.0$\pm$4.8 & 86.7$\pm$5.4 & 67.6$\pm$1.3 & \multicolumn{1}{c|}{75.9$\pm$1.3} & 88.5$\pm$2.1 & 91.0$\pm$2.6 & 63.9$\pm$3.8 & \multicolumn{1}{c}{75.0$\pm$2.2} \\
\multicolumn{1}{c}{OSBP}\cite{saito2018open} & & & & 86.0$\pm$1.1 & 86.8$\pm$1.2 & 79.2$\pm$0.4 & \multicolumn{1}{c|}{\textbf{82.7$\pm$0.6}} & 89.2$\pm$0.4 & 90.5$\pm$0.4 & 75.5$\pm$1.4 & \multicolumn{1}{c}{\textbf{82.4$\pm$0.9}}\\
\multicolumn{1}{c}{UAN}\cite{you2019universal} & & & & 89.4$\pm$0.4 & 95.5$\pm$0.1 & 31.0$\pm$0.9 &  \multicolumn{1}{c|}{46.8$\pm$1.0} & 89.5$\pm$0.4  & 95.6$\pm$0.5  & 24.4$\pm$0.9 & \multicolumn{1}{c}{38.9$\pm$1.1} \\
\multicolumn{1}{c}{\textbf{ROS}}  & & & & 87.3$\pm$1.5 & 88.4$\pm$1.7 & 76.7$\pm$2.4 & \multicolumn{1}{c|}{82.1$\pm$1.4} & 86.7$\pm$0.5 & 87.5$\pm$0.6 & 77.8$\pm$0.6 & \multicolumn{1}{c}{\textbf{82.4$\pm$0.6}}\\
     
\hline
& & & & \multicolumn{4}{c|}{D $\rightarrow$ W} & \multicolumn{4}{c}{W $\rightarrow$ D } 
 \\
 
      &  & & & OS & OS* & UNK & \multicolumn{1}{c|}{\textbf{\underline{HOS}}} & OS & OS* & UNK &  \multicolumn{1}{c}{\textbf{\underline{HOS}}}\\
\hline
\multicolumn{1}{c}{STA\textsubscript{sum}}& & & &  92.8$\pm$1.3 & 97.1$\pm$0.8 & 49.7$\pm$8.1 & \multicolumn{1}{c|}{65.5$\pm$7.0} & 92.2$\pm$0.5 & 96.6$\pm$0.4 & 48.5$\pm$6.0 & \multicolumn{1}{c}{64.4$\pm$5.1} \\
\multicolumn{1}{c}{STA\textsubscript{max}}& & & & 90.6$\pm$2.8 & 94.1$\pm$3.2 & 55.5$\pm$1.3 & \multicolumn{1}{c|}{69.8$\pm$0.2} & 83.4$\pm$6.4 & 84.9$\pm$7.2 & 67.8$\pm$5.0 & \multicolumn{1}{c}{75.2$\pm$3.6}\\
\multicolumn{1}{c}{OSBP}& & & & 97.5$\pm$0.5 & 97.7$\pm$0.2 & 96.7$\pm$2.7 & \multicolumn{1}{c|}{\textbf{97.2$\pm$1.4}} & 97.8$\pm$1.1 & 99.1$\pm$1.0 & 84.2$\pm$2.2 & \multicolumn{1}{c}{91.1$\pm$1.6}\\
\multicolumn{1}{c}{UAN}& & & &  95.5$\pm$0.1 & 99.8$\pm$0.0 & 52.5$\pm$1.1 & \multicolumn{1}{c|}{68.8$\pm$1.0}&  94.7$\pm$0.4  & 81.5$\pm$32.0 & 41.4$\pm$4.2 & \multicolumn{1}{c}{53.0$\pm$9.0} \\
\multicolumn{1}{c}{\textbf{ROS}}& & & & 98.7$\pm$0.5 & 99.3$\pm$0.4 & 93.0$\pm$2.5 & \multicolumn{1}{c|}{96.0$\pm$1.5} & 99.9$\pm$0.0 & 100.0$\pm$0.0 & 99.4$\pm$0.0 & \multicolumn{1}{c}{\textbf{99.7$\pm$0.0}} \\

\hline
& & \multicolumn{4}{c|}{D $\rightarrow$ A} & \multicolumn{4}{c|}{W $\rightarrow$ A } & \multicolumn{4}{c}{Avg.} 
 \\
 
      &  & OS & OS* & UNK & \multicolumn{1}{c|}{\textbf{\underline{HOS}}} & OS & OS* & UNK &  \multicolumn{1}{c|}{\textbf{\underline{HOS}}} & OS & OS* & UNK &  \multicolumn{1}{c}{\textbf{\underline{HOS}}}\\
\hline
\multicolumn{1}{c}{STA\textsubscript{sum}} & & 90.5$\pm$1.9 & 94.1$\pm$2.1 & 55.0$\pm$1.7 & \multicolumn{1}{c|}{69.4$\pm$1.2} & 87.9$\pm$7.6 & 92.1$\pm$9.0 & 46.2$\pm$8.2 & \multicolumn{1}{c|}{60.9$\pm$5.4} & 90.6$\pm$1.8 & 94.6$\pm$2.0 & 50.5$\pm$0.8 & \multicolumn{1}{c}{65.5$\pm$0.3}    \\
\multicolumn{1}{c}{STA\textsubscript{max}} & & 81.5$\pm$5.1 & 83.1$\pm$6.2 & 65.9$\pm$5.0 & \multicolumn{1}{c|}{73.2$\pm$0.9} & 66.4$\pm$14.5 & 66.2$\pm$16.3 & 68.0$\pm$5.2 & \multicolumn{1}{c|}{66.1$\pm$7.1} & 82.6$\pm$2.1 & 84.3$\pm$2.4 & 64.8$\pm$0.9 & \multicolumn{1}{c}{72.5$\pm$0.8}\\
\multicolumn{1}{c}{OSBP} & & 75.8$\pm$0.3 & 76.1$\pm$0.4 & 72.3$\pm$1.2 & \multicolumn{1}{c|}{75.1$\pm$1.2} & 73.1$\pm$0.2 & 73.0$\pm$0.2 & 74.4$\pm$0.7 & \multicolumn{1}{c|}{73.7$\pm$0.3} & 86.6$\pm$0.1 & 87.2$\pm$0.1 & 80.4$\pm$0.7 & \multicolumn{1}{c}{83.7$\pm$0.4}\\
\multicolumn{1}{c}{UAN} & &  89.9$\pm$0.2  & 93.5$\pm$0.1 & 53.4$\pm$0.6 & \multicolumn{1}{c|}{68.0$\pm$0.5} & 89.5$\pm$0.6  & 94.1$\pm$0.2 & 38.8$\pm$0.5 & \multicolumn{1}{c|}{54.9$\pm$0.5} & 91.4$\pm$0.1  & 93.4$\pm$5.3 & 40.3$\pm$0.7 & \multicolumn{1}{c}{55.1$\pm$1.4}\\
\multicolumn{1}{c}{\textbf{ROS}} & & 75.4$\pm$0.8 & 74.8$\pm$1.0 & 81.2$\pm$0.9 & \multicolumn{1}{c|}{\textbf{77.9$\pm$0.2}} & 71.3$\pm$0.5 & 69.7$\pm$0.6 & 86.6$\pm$2.8 & \multicolumn{1}{c|}{\textbf{77.2$\pm$1.0}}  & 86.6$\pm$0.4 & 86.6$\pm$0.5 & 85.8$\pm$0.1 & \multicolumn{1}{c}{\textbf{85.9$\pm$0.2}}\\
\hline\hline
&       \multicolumn{12}{c}{\textbf{Office-31 VGGNet}}        \\
\hline
& & & & \multicolumn{4}{c|}{A $\rightarrow$ W } & \multicolumn{4}{c}{A $\rightarrow$ D } 
 \\
     & & & & OS & OS* & UNK & \multicolumn{1}{c|}{\textbf{\underline{HOS}}} & OS & OS* & UNK &  \multicolumn{1}{c}{\textbf{\underline{HOS}}}\\
     
\hline
\multicolumn{1}{c}{OSBP}\cite{saito2018open} & & & & 79.1$\pm$0.8 & 79.4$\pm$1.2 & 75.8$\pm$3.4 & \multicolumn{1}{c|}{77.5$\pm$1.2} & 86.8$\pm$6.3 & 87.9$\pm$6.4 & 75.2$\pm$6.1 & \multicolumn{1}{c}{\textbf{81.0$\pm$6.0}} \\
\multicolumn{1}{c}{\textbf{ROS}} & & & & 80.4$\pm$2.4 & 80.3$\pm$2.5 & 81.7$\pm$1.7 & \multicolumn{1}{c|}{\textbf{81.0$\pm$2.1}} & 81.3$\pm$1.0 & 81.8$\pm$1.0 & 76.5$\pm$0.6 & \multicolumn{1}{c}{79.0$\pm$0.8}\\
\hline
\multicolumn{1}{c}{\textcolor{gray}{AoD \cite{feng2019attract}}} & & & & \textcolor{gray}{86.4} & \textcolor{gray}{87.7} & \textcolor{gray}{73.4} & \multicolumn{1}{c|}{\textcolor{gray}{79.9}} & \textcolor{gray}{90.1} & \textcolor{gray}{92.0} & \textcolor{gray}{71.1} & \multicolumn{1}{c}{\textcolor{gray}{79.3}} \\
     
\hline
& & & &\multicolumn{4}{c|}{D $\rightarrow$ W} & \multicolumn{4}{c}{W $\rightarrow$ D } 
 \\
 
      &  & & & OS & OS* & UNK & \multicolumn{1}{c|}{\textbf{\underline{HOS}}} & OS & OS* & UNK &  \multicolumn{1}{c}{\textbf{\underline{HOS}}}\\
\hline

\multicolumn{1}{c}{OSBP} & & & & 96.4$\pm$0.6 & 96.8$\pm$0.7 & 93.4$\pm$0.8 & \multicolumn{1}{c|}{\textbf{95.0$\pm$0.4}} & 97.5$\pm$0.3 & 98.9$\pm$0.4 & 84.2$\pm$0.8 & \multicolumn{1}{c}{91.0$\pm$0.5} \\
\multicolumn{1}{c}{\textbf{ROS}} & & & & 98.7$\pm$0.4 & 99.5$\pm$0.4 & 89.9$\pm$0.9 & \multicolumn{1}{c|}{94.4$\pm$0.6} & 99.4$\pm$0.0 & 99.3$\pm$0.0 & 100.0$\pm$0.0 & \multicolumn{1}{c}{\textbf{99.7$\pm$0.0}}\\
\hline
\multicolumn{1}{c}{\textcolor{gray}{AoD \cite{feng2019attract}}} & & & & \textcolor{gray}{97.9} & \textcolor{gray}{99.8} & \textcolor{gray}{78.9} & \multicolumn{1}{c|}{\textcolor{gray}{88.1}} & \textcolor{gray}{98.2} & \textcolor{gray}{99.3} & \textcolor{gray}{87.2} & \multicolumn{1}{c}{\textcolor{gray}{92.9}}

\\
\hline

& & \multicolumn{4}{c|}{D $\rightarrow$ A} & \multicolumn{4}{c|}{W $\rightarrow$ A  } & \multicolumn{4}{c}{Avg. } 
 \\
 
      &  & OS & OS* & UNK & \multicolumn{1}{c|}{\textbf{\underline{HOS}}} & OS & OS* & UNK &  \multicolumn{1}{c|}{\textbf{\underline{HOS}}}  & OS & OS* & UNK &  \multicolumn{1}{c}{\textbf{\underline{HOS}}} \\
\hline

\multicolumn{1}{c}{OSBP} & & 75.1$\pm$1.3 & 74.4$\pm$1.5 & 82.4$\pm$1.2 & \multicolumn{1}{c|}{\textbf{78.2}$\pm$0.6} &
70.3$\pm$4.5 & 69.7$\pm$4.5 & 76.4$\pm$5.3 & \multicolumn{1}{c|}{72.9$\pm$4.8}  & 84.2$\pm$0.4 & 84.5$\pm$0.4 & 81.2$\pm$1.4 & \multicolumn{1}{c}{82.6$\pm$0.8}\\
\multicolumn{1}{c}{\textbf{ROS}} &  & 77.0$\pm$0.0 & 76.7$\pm$0.4  & 79.6$\pm$3.5 & \multicolumn{1}{c|}{78.1$\pm$1.4} & 64.9$\pm$0.2 & 62.2$\pm$0.2 & 91.6$\pm$0.5 & \multicolumn{1}{c|}{\textbf{74.1$\pm$0.0}} & 83.6$\pm$0.4 & 83.3$\pm$0.4 & 86.5$\pm$0.3 & \multicolumn{1}{c}{\textbf{84.4$\pm$0.2}}\\
\hline
\multicolumn{1}{c}{\textcolor{gray}{AoD \cite{feng2019attract}}} & & \textcolor{gray}{81.6} & \textcolor{gray}{88.4} & \textcolor{gray}{13.6} & \multicolumn{1}{c|}{\textcolor{gray}{23.6}} & \textcolor{gray}{80.3} & \textcolor{gray}{82.6} & \textcolor{gray}{57.3} & \multicolumn{1}{c|}{\textcolor{gray}{67.7}}  & \textcolor{gray}{89.1} & \textcolor{gray}{91.6} & \textcolor{gray}{63.6} & \multicolumn{1}{c}{\textcolor{gray}{71.9}}\\
\hline

\end{tabular} 
}

    \label{tab:office31Resnet50} 
\end{table}
