# Supplementary material
Source: ML conference proceedings conference paper supplement (https://www.ecva.net/papers/eccv_2020/papers_ECCV/html/123610409_ECCV_2020_paper.php)
Supplement: Supplementary file 9 [file 123610409-supp.zip › 2568-supp/table_officehome.tex]

\renewcommand{\thetable}{1s}
\begin{table}[t]
\centering
\caption{Office-Home Resnet50}
\resizebox{\textwidth}{!}{
\begin{tabular}{l@{~~~}cc cccc cccc cccc  }
\hline
            \multicolumn{15}{c}{\textbf{Office-Home}}        \\
\hline
 & &  & & & \multicolumn{4}{c|}{Pr $\rightarrow$ Rw } & \multicolumn{4}{c}{Pr $\rightarrow$ Cl }  & 
 \\
        & & & & & OS & OS* & UNK & \multicolumn{1}{c|}{\textbf{\underline{HOS}}} & OS & OS* & UNK &  \multicolumn{1}{c}{\textbf{\underline{HOS}}} \\
\hline
\multicolumn{1}{c}{STA\textsubscript{sum}}& \multirow{2}{*}{\cite{liu2019separate}}  & &  & & $77.5\pm$2.3 & $78.1\pm$2.2 & $63.3\pm$8.9 & \multicolumn{1}{c|}{$69.7\pm$5.9} &  $45.7\pm$2.1 & $44.7\pm$1.9 & $71.5\pm$6.6 & \multicolumn{1}{c}{$55.0\pm$3.3} \\

\multicolumn{1}{c}{STA\textsubscript{max}} & & & & & $75.7\pm$2.4 & $76.2\pm$2.2 & $64.3\pm$9.8 & \multicolumn{1}{c|}{$69.5\pm$6.2} & $45.1\pm$4.5 & $44.2\pm$4.7 & $67.1\pm$1.9 & \multicolumn{1}{c}{$53.2\pm$2.8}  \\

\multicolumn{1}{c}{OSBP}\cite{saito2018open} & & & & & $76.0\pm$1.3 & $76.2\pm$1.3 & $71.7\pm$1.6 & \multicolumn{1}{c|}{$73.9$$\pm$1.4} & $45.3\pm$1.1 & 44.5$\pm$1.2 & 66.3$\pm$1.8 & \multicolumn{1}{c}{$53.2$$\pm$0.8}   \\

\multicolumn{1}{c}{UAN}\cite{you2019universal} & &  &  & & 81.0$\pm$0.1 & 84.0$\pm$0.1 & 0.1$\pm$0.0 & \multicolumn{1}{c|}{0.2$\pm$0.0} & 57.1$\pm$0.2  & 59.1$\pm$0.8 & 0.0$\pm$0.0 & \multicolumn{1}{c}{0.0$\pm$0.0}  \\
\multicolumn{1}{c}{\textbf{ROS}} &  & & & & 71.1$\pm$1.3 & 70.8$\pm$1.4 & 78.4$\pm$1.8 &  \multicolumn{1}{c|}{\textbf{74.4$\pm$0.1}} & 47.5$\pm$0.9 & 46.5$\pm$1.0 & 71.2$\pm$0.9 & \multicolumn{1}{c}{\textbf{56.3$\pm$0.5}}  \\

\hline

  & &  & & &  \multicolumn{4}{c|}{Pr $\rightarrow$ Ar }  &  \multicolumn{4}{c}{Ar $\rightarrow$ Pr }  & 

 \\
        & & & & & OS & OS* & UNK & \multicolumn{1}{c|}{\textbf{\underline{HOS}}} & OS & OS* & UNK &  \multicolumn{1}{c}{\textbf{\underline{HOS}}} \\
\hline
\multicolumn{1}{c}{STA\textsubscript{sum}}& &  & & &  $56.1\pm$2.8 & $55.4\pm$2.5 & $73.7\pm$12.0 & \multicolumn{1}{c|}{$63.1\pm$5.6}  &   $68.4\pm$3.4 & $68.7\pm$3.8 & $59.7\pm$5.5 & \multicolumn{1}{c}{$63.7\pm$1.4} \\
\multicolumn{1}{c}{STA\textsubscript{max}} & & & & &  $54.9\pm$6.3 & $54.2\pm$6.4 & $72.4\pm$7.6 & \multicolumn{1}{c|}{$61.9\pm$6.3} & $67.3\pm$1.0 & $68.0\pm$1.8 & $48.4\pm$22.6 &
\multicolumn{1}{c}{$54.0\pm$17.5}\\
\multicolumn{1}{c}{OSBP} & & & & & $59.4\pm$0.7 & $59.1\pm$0.8 & $68.1\pm$0.8 & \multicolumn{1}{c|}{\textbf{63.2$\pm$0.2}}  & $71.3\pm$0.5 & $71.8\pm$0.5 & $59.8\pm$0.5 & \multicolumn{1}{c}{$65.2\pm$0.4} \\
\multicolumn{1}{c}{UAN} & & & &  & 78.1$\pm$0.1  & 81.1$\pm$0.2 & 0.0$\pm$0.0 & \multicolumn{1}{c|}{0.0$\pm$0.0} & 78.1$\pm$0.1  & 81.1$\pm$0.2 & 0.0$\pm$0.0 & \multicolumn{1}{c}{0.0$\pm$0.0} \\
\multicolumn{1}{c}{\textbf{ROS}} & & &  & & 57.6$\pm$0.8 & 57.3$\pm$0.8 & 64.3$\pm$1.7 & \multicolumn{1}{c|}{60.6$\pm$1.2}  & 68.4$\pm$1.1 & 68.4$\pm$1.2 & 70.3$\pm$1.6 & \multicolumn{1}{c}{\textbf{69.3$\pm$0.2}} \\
\hline

  & &  & & &  \multicolumn{4}{c|}{Ar $\rightarrow$ Rw }  &  \multicolumn{4}{c}{Ar $\rightarrow$ Cl }  & 
 \\
        & & & & & OS & OS* & UNK & \multicolumn{1}{c|}{\textbf{\underline{HOS}}} & OS & OS* & UNK &  \multicolumn{1}{c}{\textbf{\underline{HOS}}}  \\
\hline

\multicolumn{1}{c}{STA\textsubscript{sum}}& &  &  & & $80.0\pm$0.6 & $81.1\pm$0.4 & $50.5\pm$6.3 & \multicolumn{1}{c|}{$62.1$$\pm$5.0}   & $51.3\pm$2.5 & $50.8\pm$2.7 & $63.4\pm$3.4 & \multicolumn{1}{c}{$56.3$$\pm$1.2}  \\
\multicolumn{1}{c}{STA\textsubscript{max}} & & & & & $77.9\pm$0.4 & $78.6\pm$0.4 & 60.4$\pm$1.9 & \multicolumn{1}{c|}{$68.3$$\pm$1.2} & $47.0\pm$5.8 & 46.0$\pm$6.3 & 72.3$\pm$6.2 & \multicolumn{1}{c}{$55.8$$\pm$2.6}\\
\multicolumn{1}{c}{OSBP} & & & & & $78.8\pm$0.8 & $79.3\pm$0.9 & $67.5\pm$0.3 & \multicolumn{1}{c|}{$72.9$$\pm$0.5} &   50.7$\pm$0.7 & 50.2$\pm$0.9 & 61.1$\pm$0.7 & \multicolumn{1}{c}{$55.1$$\pm$0.4} \\
\multicolumn{1}{c}{UAN} & & &  & & 85.1$\pm$0.1  & 88.2$\pm$0.2 & 0.1$\pm$0.0 & \multicolumn{1}{c|}{0.2$\pm$0.0} &  60.0$\pm$0.1 & 62.4$\pm$0.1 & 0.0$\pm$0.0 & \multicolumn{1}{c}{0.0$\pm$0.0} \\
\multicolumn{1}{c}{\textbf{ROS}} & & &  & & 75.9$\pm$1.1 & 75.8$\pm$1.2 & 77.2$\pm$0.9 & \multicolumn{1}{c|}{\textbf{76.5$\pm$0.4}}& 51.5$\pm$1.0 & 50.6$\pm$1.1 & 74.1$\pm$1.0 & \multicolumn{1}{c}{\textbf{60.1$\pm$0.4}}\\

\hline

  & &  & & &  \multicolumn{4}{c|}{Rw $\rightarrow$ Ar }  &  \multicolumn{4}{c}{Rw $\rightarrow$ Pr }  & 
 \\
        & & & & & OS & OS* & UNK & \multicolumn{1}{c|}{\textbf{\underline{HOS}}} & OS & OS* & UNK &  \multicolumn{1}{c}{\textbf{\underline{HOS}}}  \\
\hline

\multicolumn{1}{c}{STA\textsubscript{sum}}& &  &  & &  67.7$\pm$2.8 & 67.9$\pm$2.8 & 62.3$\pm$2.8 & \multicolumn{1}{c|}{65.0$\pm$2.8}  & 77.1$\pm$1.7 & 77.9$\pm$1.7 & 58.0$\pm$4.5 & \multicolumn{1}{c}{66.4$\pm$3.3} \\
\multicolumn{1}{c}{STA\textsubscript{max}} & &  &  & &  67.5$\pm$1.7 & 67.5$\pm$1.8 & 66.7$\pm$3.0 & \multicolumn{1}{c|}{67.1$\pm$1.2} & 76.3$\pm$0.4 & 77.1$\pm$0.5 & 55.4$\pm$1.5 & \multicolumn{1}{c}{64.5$\pm$1.0}\\
\multicolumn{1}{c}{OSBP}& &  &  & & 66.1$\pm$0.5 & 66.1$\pm$0.6 & 67.3$\pm$0.6 & \multicolumn{1}{c|}{66.7$\pm$0.4} & 76.0$\pm$0.7 & 76.3$\pm$0.7 & 68.6$\pm$2.1 & \multicolumn{1}{c}{72.3$\pm$1.3} \\
\multicolumn{1}{c}{UAN} & &  &  & &  74.8$\pm$0.0 & 77.5$\pm$0.1 & 0.1$\pm$0.0 & \multicolumn{1}{c|}{0.2$\pm$0.0} & 82.1$\pm$0.1  & 85.0$\pm$0.2 & 0.1$\pm$0.1 & \multicolumn{1}{c}{0.1$\pm$0.1}\\
\multicolumn{1}{c}{\textbf{ROS}}& &  &  & &   67.1$\pm$1.0 & 67.0$\pm$1.1 & 70.8$\pm$2.0 & \multicolumn{1}{c|}{\textbf{68.8$\pm$0.6}} & 72.2$\pm$0.7 & 72.0$\pm$0.6 & 80.0$\pm$1.1 & \multicolumn{1}{c}{\textbf{75.7$\pm$0.9}}\\

\hline

  & &  & & &  \multicolumn{4}{c|}{Rw $\rightarrow$ Cl }  &  \multicolumn{4}{c}{Cl $\rightarrow$ Rw }  & 
   \\
        & & & & & OS & OS* & UNK & \multicolumn{1}{c|}{\textbf{\underline{HOS}}} & OS & OS* & UNK &  \multicolumn{1}{c}{\textbf{\underline{HOS}}}   \\
\hline

\multicolumn{1}{c}{STA\textsubscript{sum}}& &  &  & &  51.7$\pm$3.0 & 51.4$\pm$3.3 & 57.9$\pm$5.3 & \multicolumn{1}{c|}{54.2$\pm$0.9}   & 69.5$\pm$2.7 & 69.8$\pm$2.4 & 63.2$\pm$8.9 & \multicolumn{1}{c}{66.3$\pm$5.9} \\
\multicolumn{1}{c}{STA\textsubscript{max}} & &  &  & &   50.4$\pm$2.5 & 49.9$\pm$2.9 & 61.1$\pm$9.8 & \multicolumn{1}{c|}{54.5$\pm$2.6} & 67.0$\pm$3.0 & 67.0$\pm$2.8 & 66.7$\pm$8.7 & \multicolumn{1}{c}{66.8$\pm$5.7} \\
\multicolumn{1}{c}{OSBP}& &  &  & &  48.5$\pm$0.5 & 48.0$\pm$0.5 & 63.0$\pm$0.6 & \multicolumn{1}{c|}{54.5$\pm$0.2} & 71.9$\pm$0.9 & 72.0$\pm$0.9 & 69.2$\pm$0.2 & \multicolumn{1}{c}{\textbf{70.6$\pm$0.4}} \\
\multicolumn{1}{c}{UAN} & &  &  & &  63.5$\pm$0.1 & 66.2$\pm$0.5 & 0.0$\pm$0.0 & \multicolumn{1}{c|}{0.0$\pm$0.0} & 77.7$\pm$0.4  & 80.6$\pm$0.4 & 0.1$\pm$0.0 & \multicolumn{1}{c}{0.2$\pm$0.0}\\
\multicolumn{1}{c}{\textbf{ROS}}& &  &  & &   52.3$\pm$0.9 & 51.5$\pm$0.9 & 73.0$\pm$0.8 & \multicolumn{1}{c|}{\textbf{60.4$\pm$0.5}} & 65.6$\pm$0.3 & 65.3$\pm$0.3 & 72.2$\pm$1.6 & \multicolumn{1}{c}{68.6$\pm$0.7}\\

\hline

  & & &  \multicolumn{4}{c|}{Cl $\rightarrow$ Ar }  &  \multicolumn{4}{c|}{Cl $\rightarrow$ Pr }  & \multicolumn{4}{c}{Avg.} 
   \\
        &   & & OS & OS* & UNK & \multicolumn{1}{c|}{\textbf{\underline{HOS}}} & OS & OS* & UNK &  \multicolumn{1}{c|}{\textbf{\underline{HOS}}} & OS & OS* & UNK &  \multicolumn{1}{c}{\textbf{\underline{HOS}}} \\
\hline

\multicolumn{1}{c}{STA\textsubscript{sum}}& &  &   53.5$\pm$3.0 & 53.0$\pm$3.1 & 63.9$\pm$1.2 & \multicolumn{1}{c|}{57.9$\pm$2.3}  & 61.5$\pm$2.4 & 61.4$\pm$2.4 & 63.5$\pm$3.3 & \multicolumn{1}{c|}{62.5$\pm$2.8} & 63.3$\pm$2.1 & 63.4$\pm$2.1 & 62.6$\pm$2.3 & \multicolumn{1}{c}{61.9$\pm$2.1}  \\
\multicolumn{1}{c}{STA\textsubscript{max}} & & &  52.0$\pm$2.2 & 51.4$\pm$2.3 & 65.0$\pm$2.2 & \multicolumn{1}{c|}{57.4$\pm$0.7}  & 61.7$\pm$1.6 & 61.8$\pm$1.7 & 59.1$\pm$1.1 & \multicolumn{1}{c|}{60.4$\pm$0.7} & 61.9$\pm$2.4 & 61.8$\pm$2.6 & 63.3$\pm$1.9 & \multicolumn{1}{c}{61.1$\pm$0.3}\\
\multicolumn{1}{c}{OSBP}  &  & &  59.8$\pm$0.4 & 59.4$\pm$0.5 & 70.3$\pm$1.3 & \multicolumn{1}{c|}{\textbf{64.3$\pm$0.4}}  & 66.9$\pm$1.5 & 67.0$\pm$1.6 & 62.7$\pm$2.3 & \multicolumn{1}{c|}{64.7$\pm$0.7}  & 64.2$\pm$0.1 & 64.1$\pm$0.1 & 66.3$\pm$0.4 & \multicolumn{1}{c}{64.7$\pm$0.2}\\
\multicolumn{1}{c}{UAN}   &  & &  67.8$\pm$0.3  & 70.5$\pm$0.5 & 0.0$\pm$0.0 & \multicolumn{1}{c|}{0.0$\pm$0.0} & 71.3$\pm$0.1 & 74.0$\pm$0.2 & 0.1$\pm$0.0 & \multicolumn{1}{c|}{0.2$\pm$0.0} &  72.5$\pm$0.0 & 75.2$\pm$0.1 & 0.0$\pm$0.0 & \multicolumn{1}{c}{0.1$\pm$0.0} \\
\multicolumn{1}{c}{\textbf{ROS}}  &  & &  54.1$\pm$1.0 & 53.6$\pm$1.1 & 65.5$\pm$2.8 & \multicolumn{1}{c|}{58.9$\pm$0.5} & 60.3$\pm$0.4 & 59.8$\pm$0.4 & 71.6$\pm$1.1 & \multicolumn{1}{c|}{\textbf{65.2$\pm$0.7}} & 62.0$\pm$0.2 & 61.6$\pm$0.2 & 72.4$\pm$0.8 & \multicolumn{1}{c}{\textbf{66.2$\pm$0.3}} \\

\hline


\end{tabular}
}

    \label{tab:officehomeResnet50} 
\end{table}
