# Supplementary material
Source: ML conference proceedings conference paper supplement (https://www.ecva.net/papers/eccv_2020/papers_ECCV/html/123610409_ECCV_2020_paper.php)

# HOS

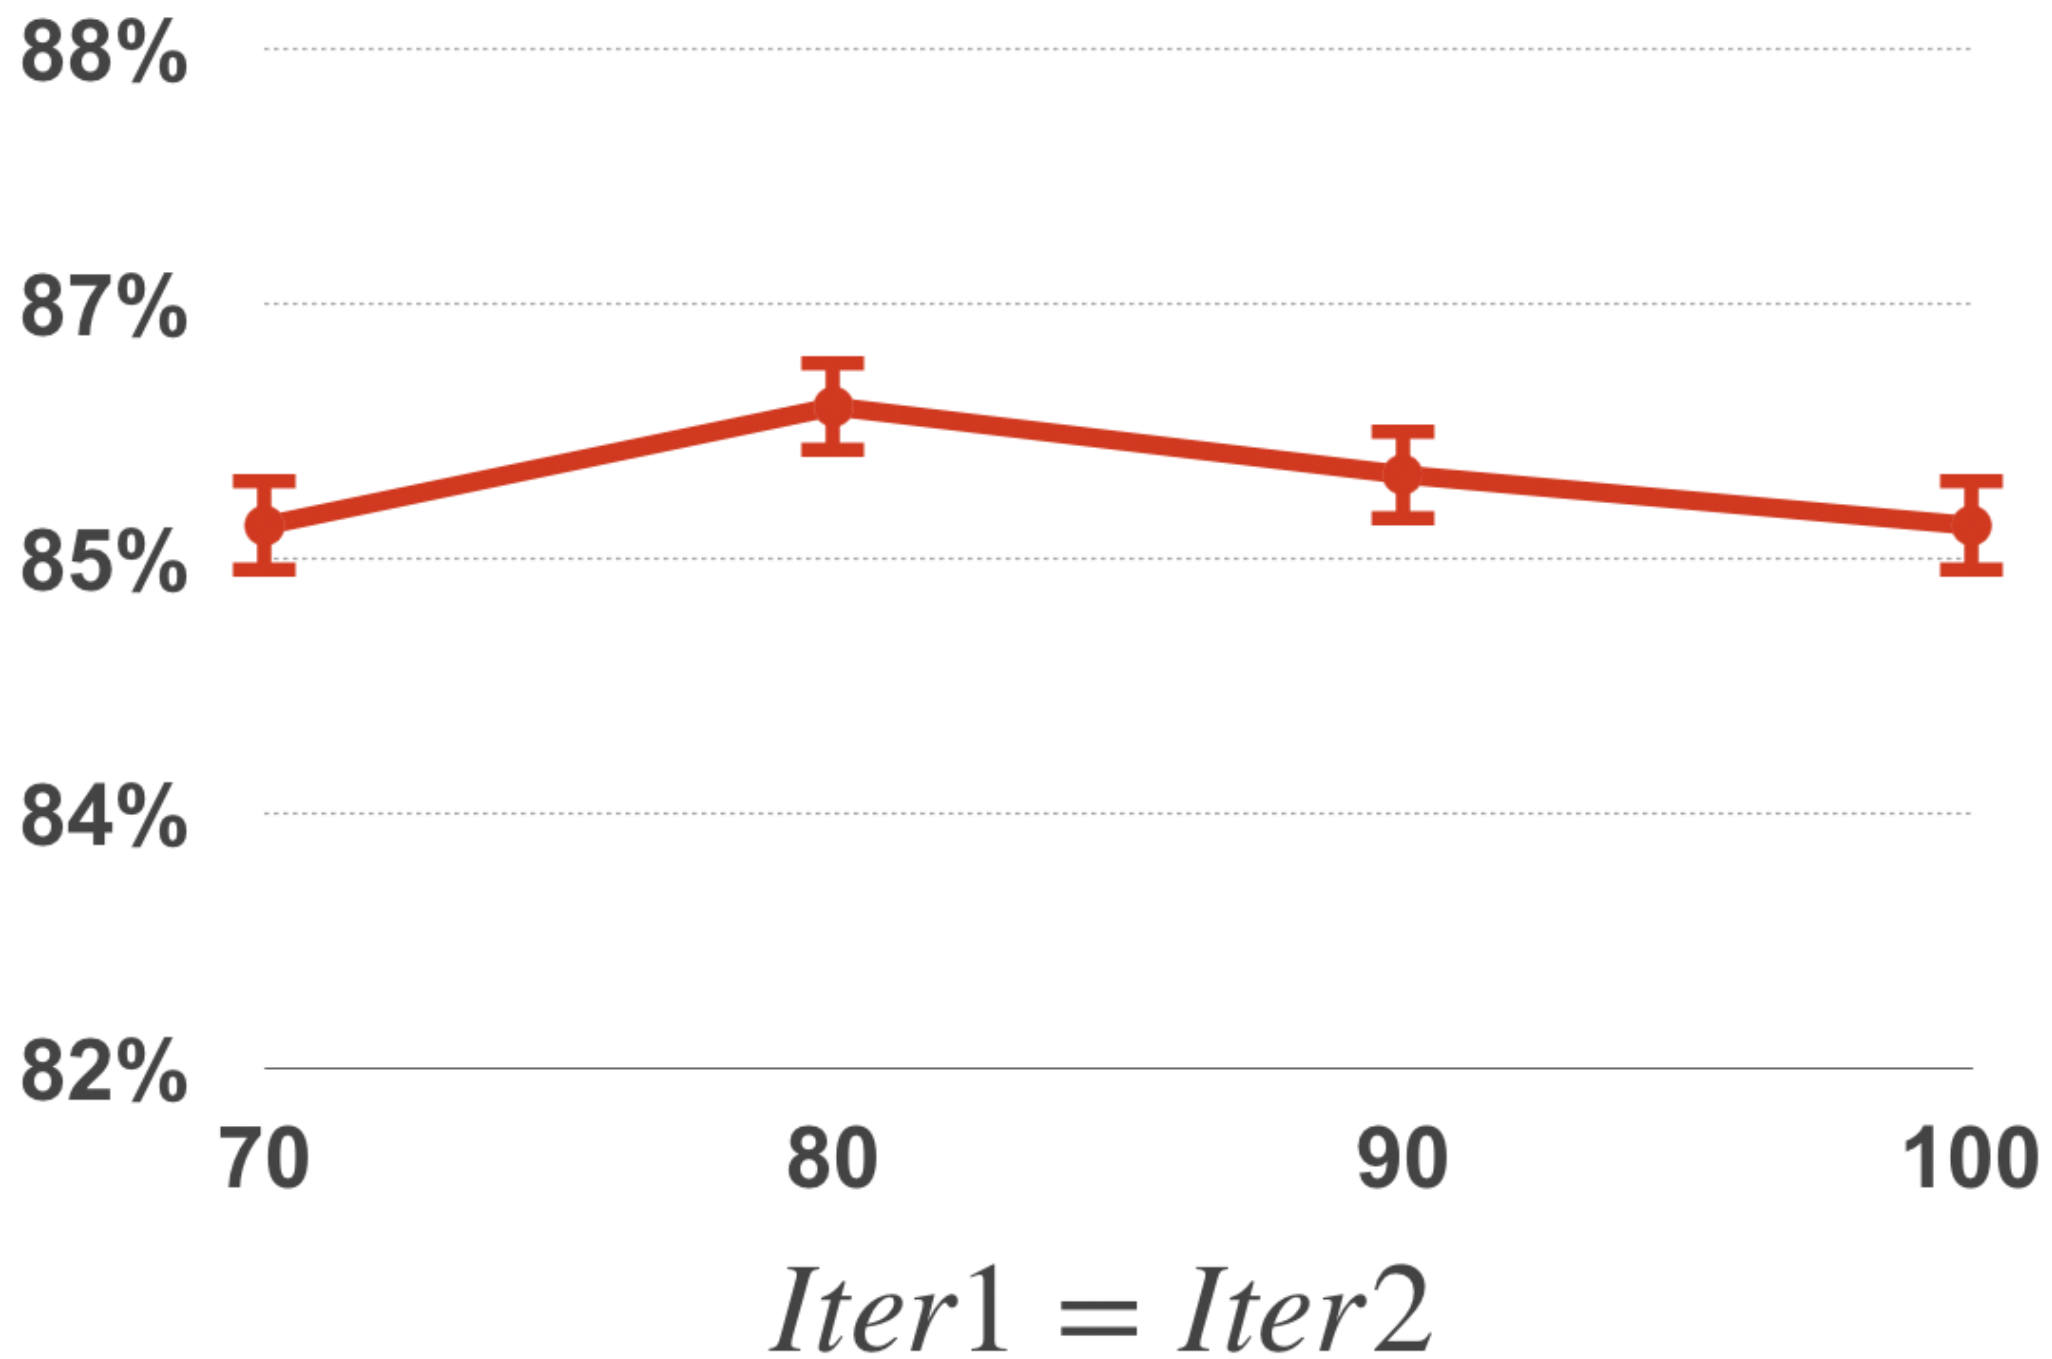

Supplement: Supplementary file 1 [file 123610409-supp.zip]

# HOS

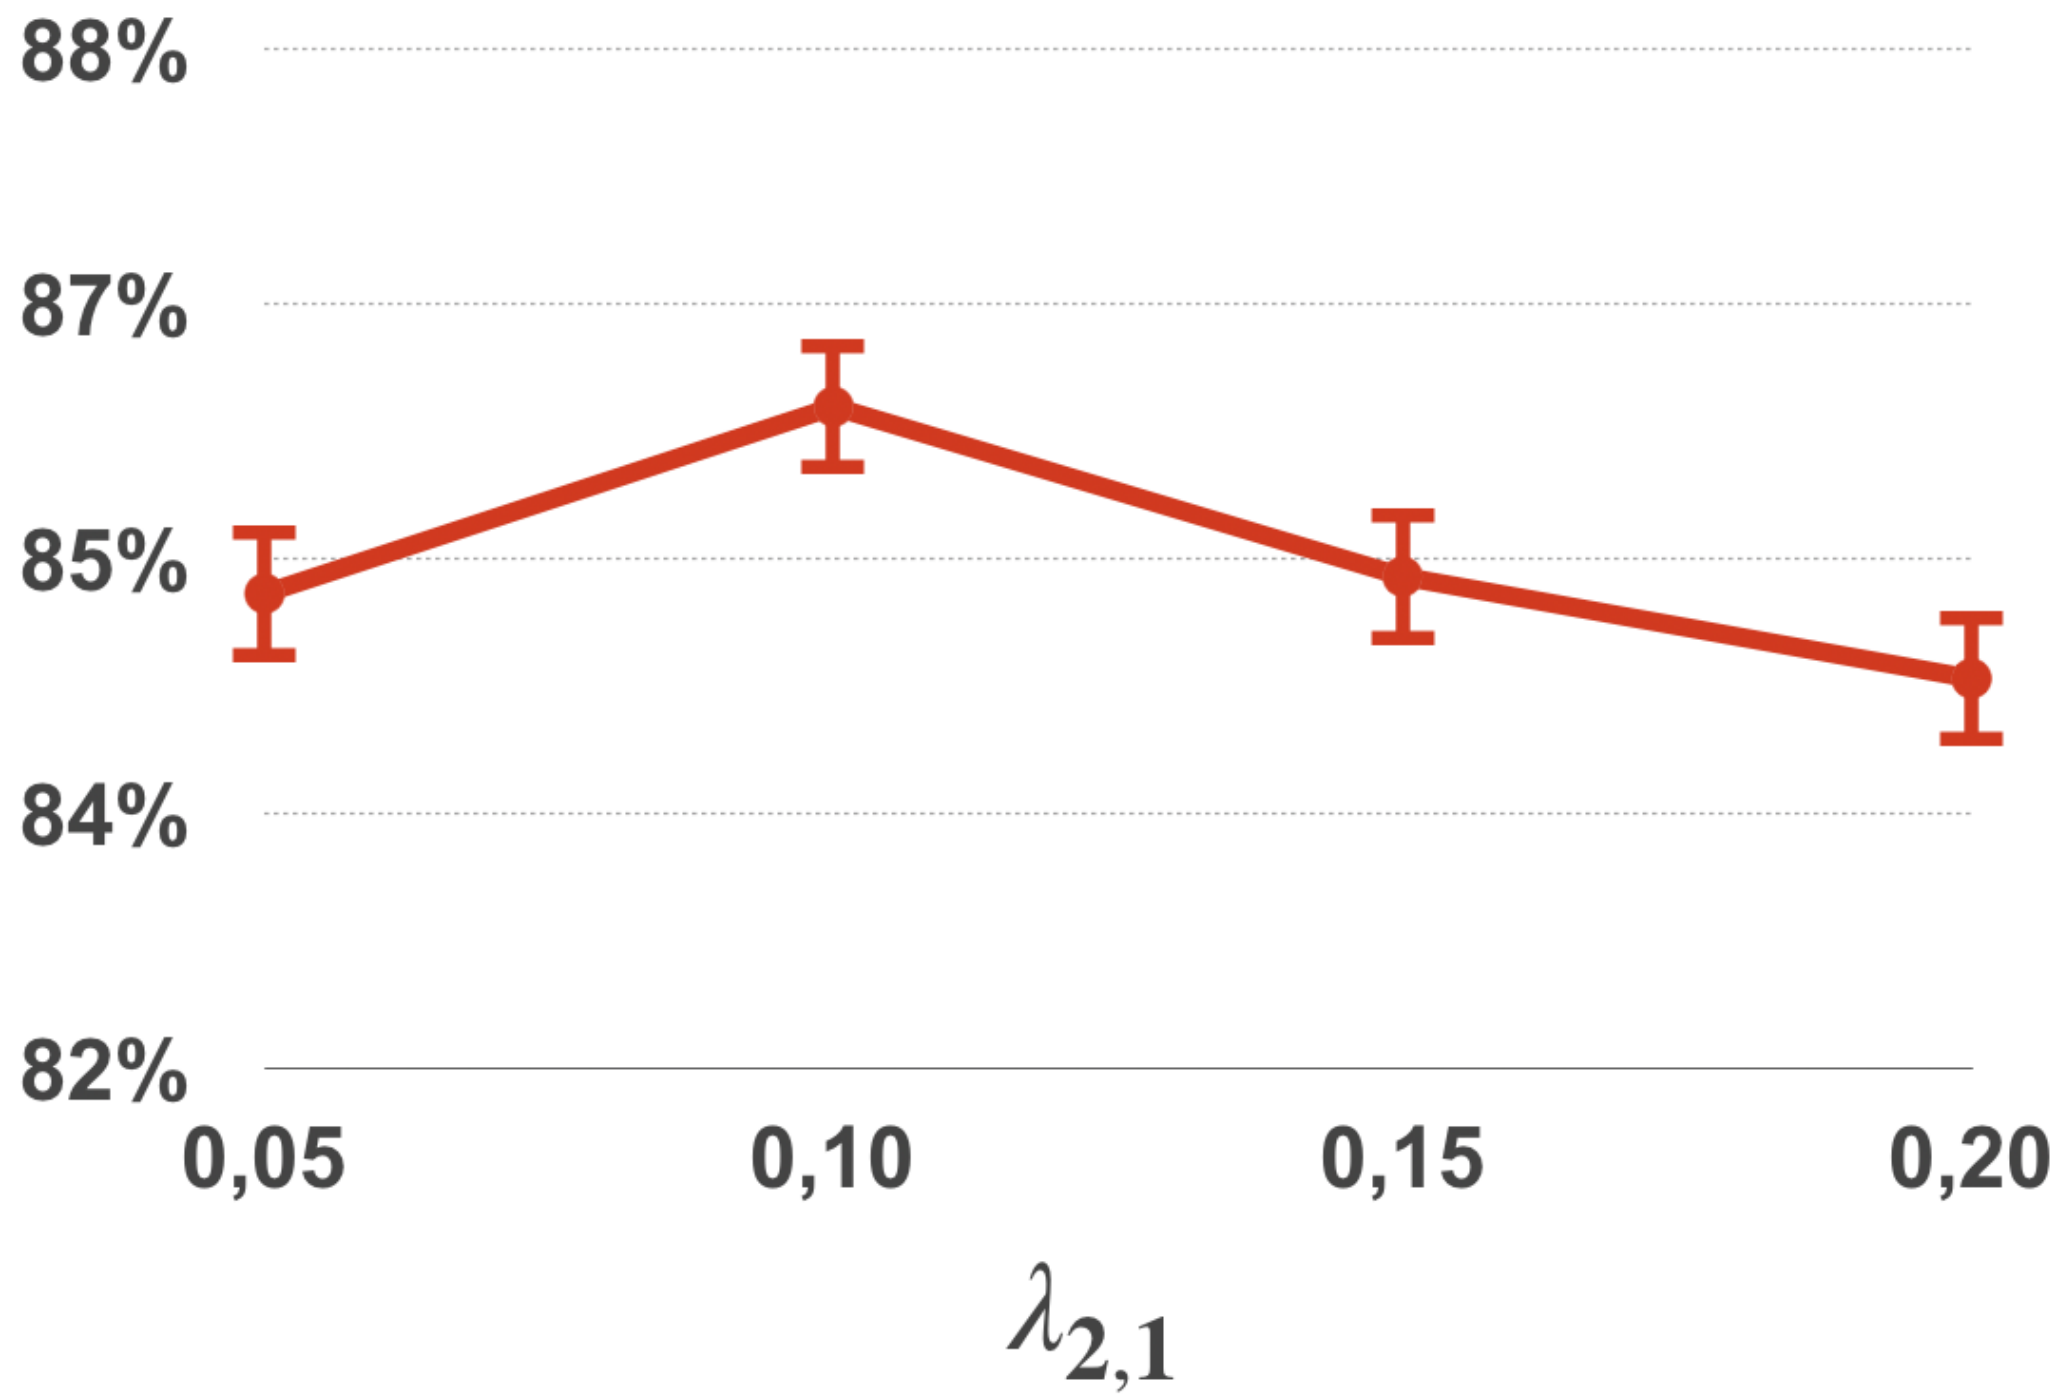

Supplement: Supplementary file 3 [file 123610409-supp.zip]

OS\*

100%

80%

60%

40%

20%

0%

40

25

10

5

Number of known classes

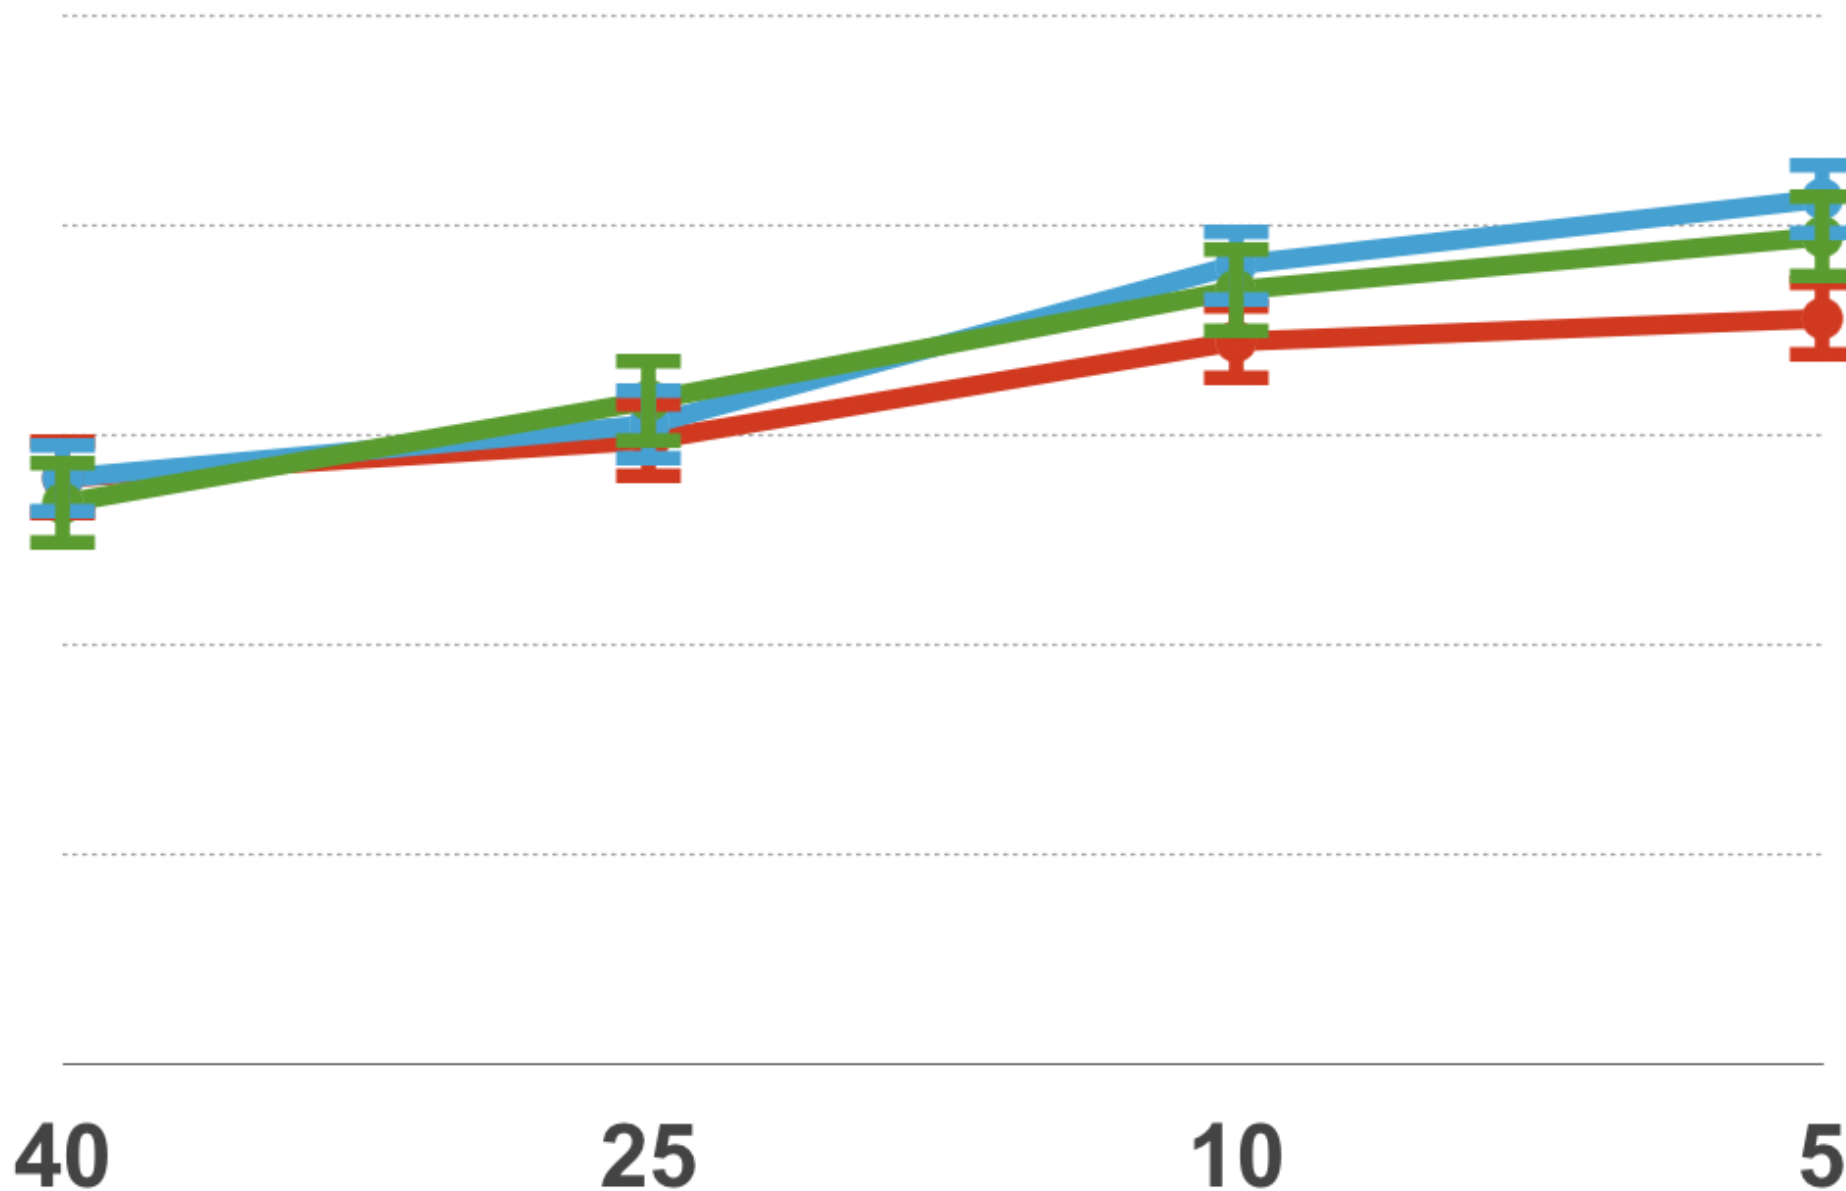

Supplement: Supplementary file 4 [file 123610409-supp.zip]

# HOS

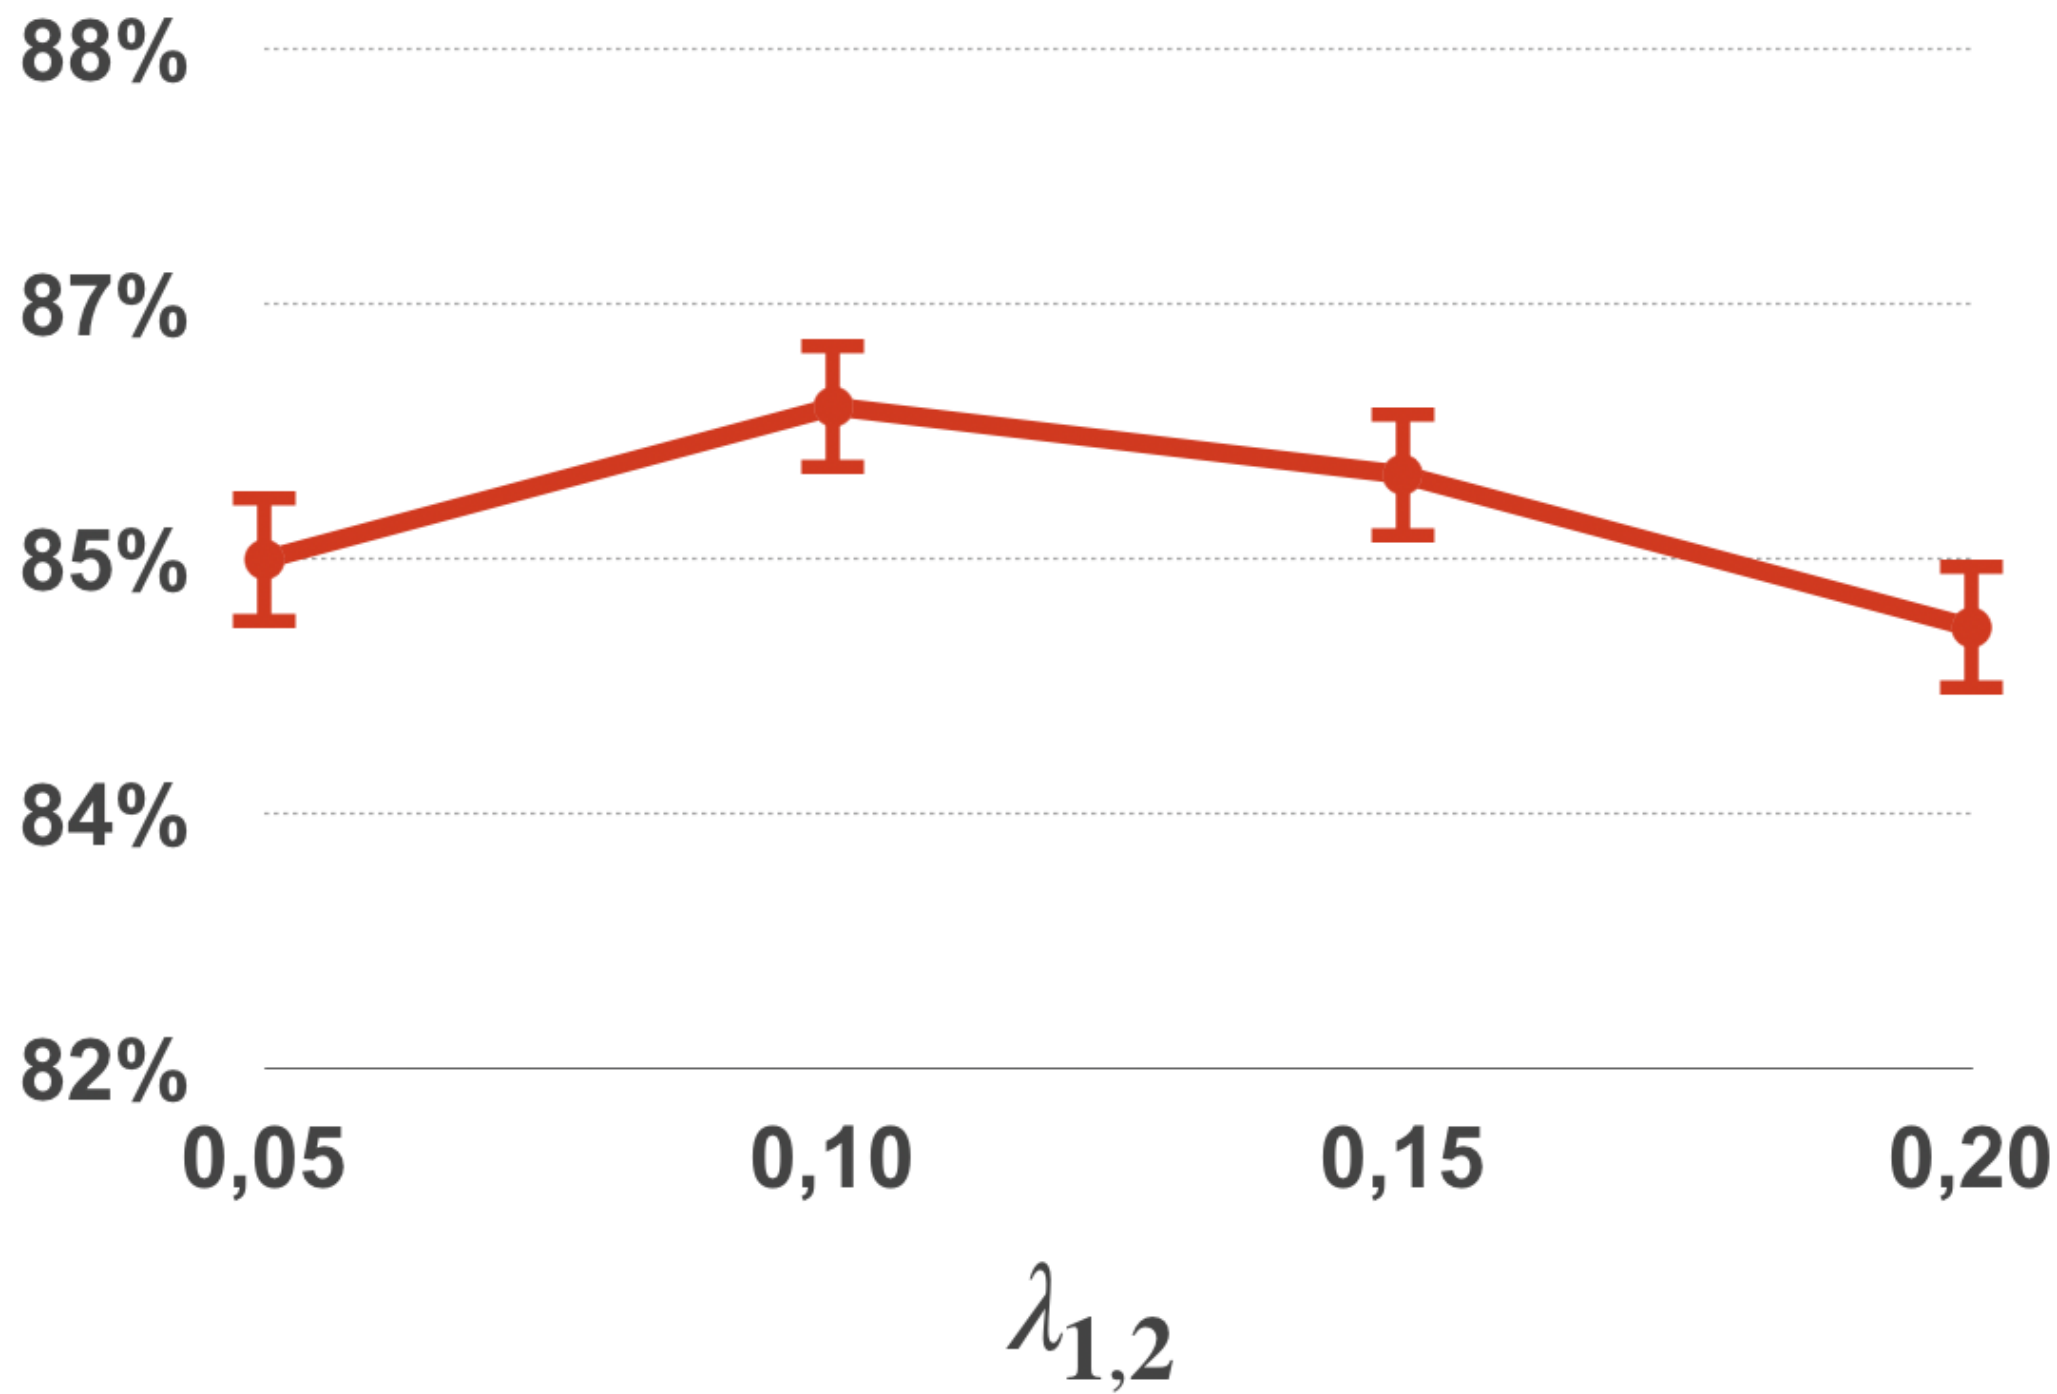

Supplement: Supplementary file 5 [file 123610409-supp.zip]

# HOS

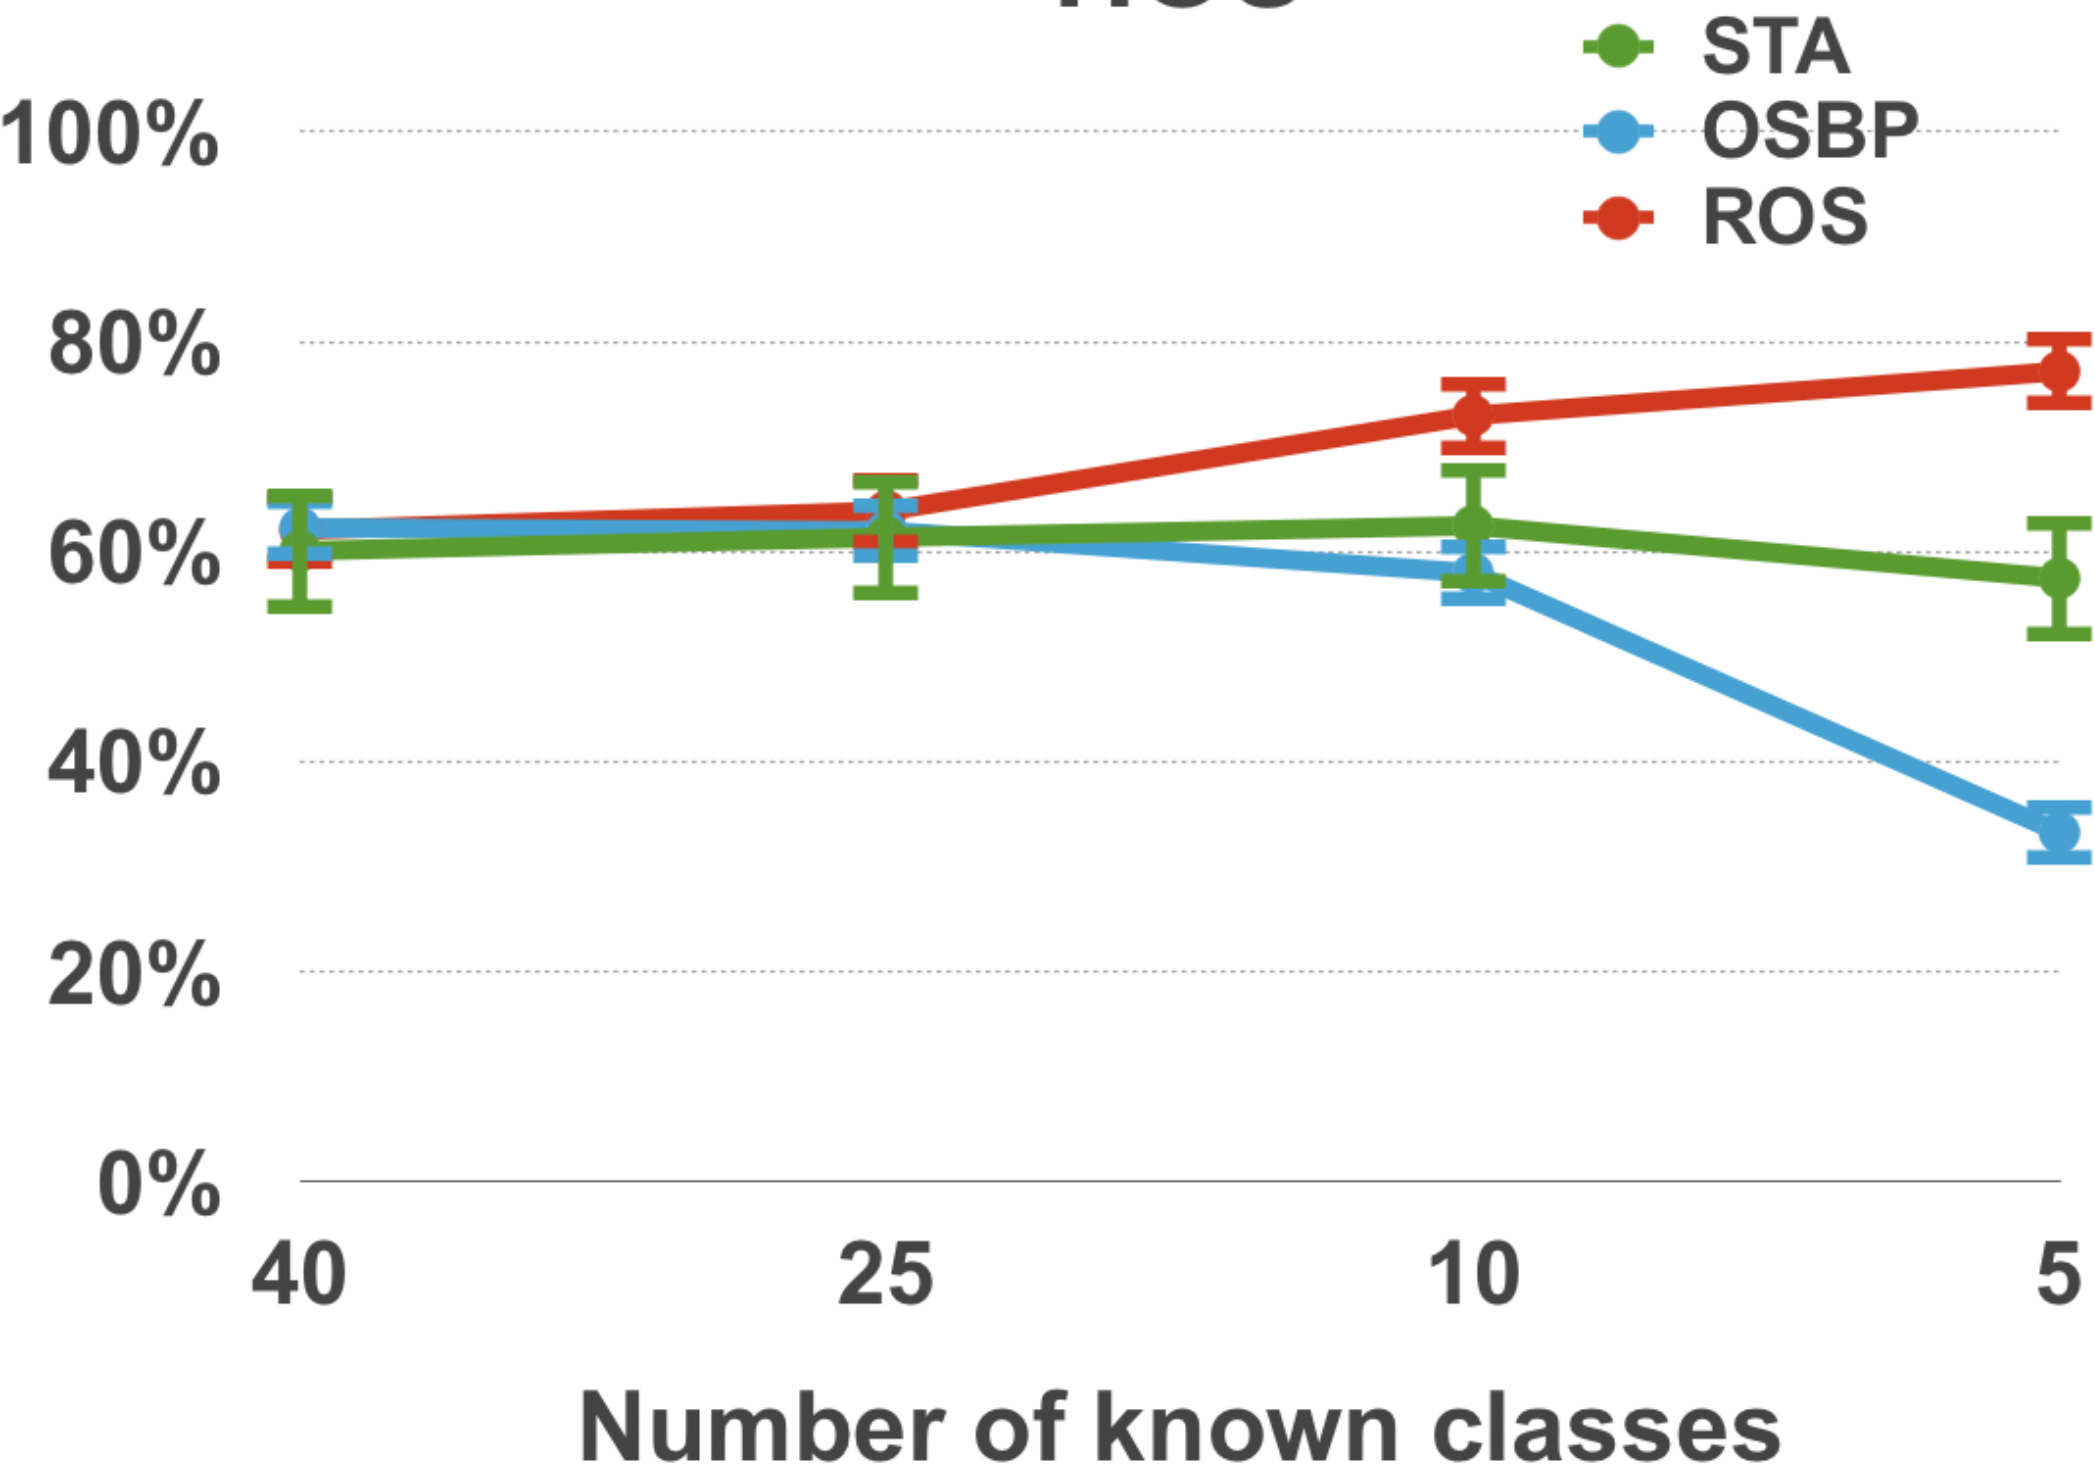

Supplement: Supplementary file 6 [file 123610409-supp.zip]

# HOS

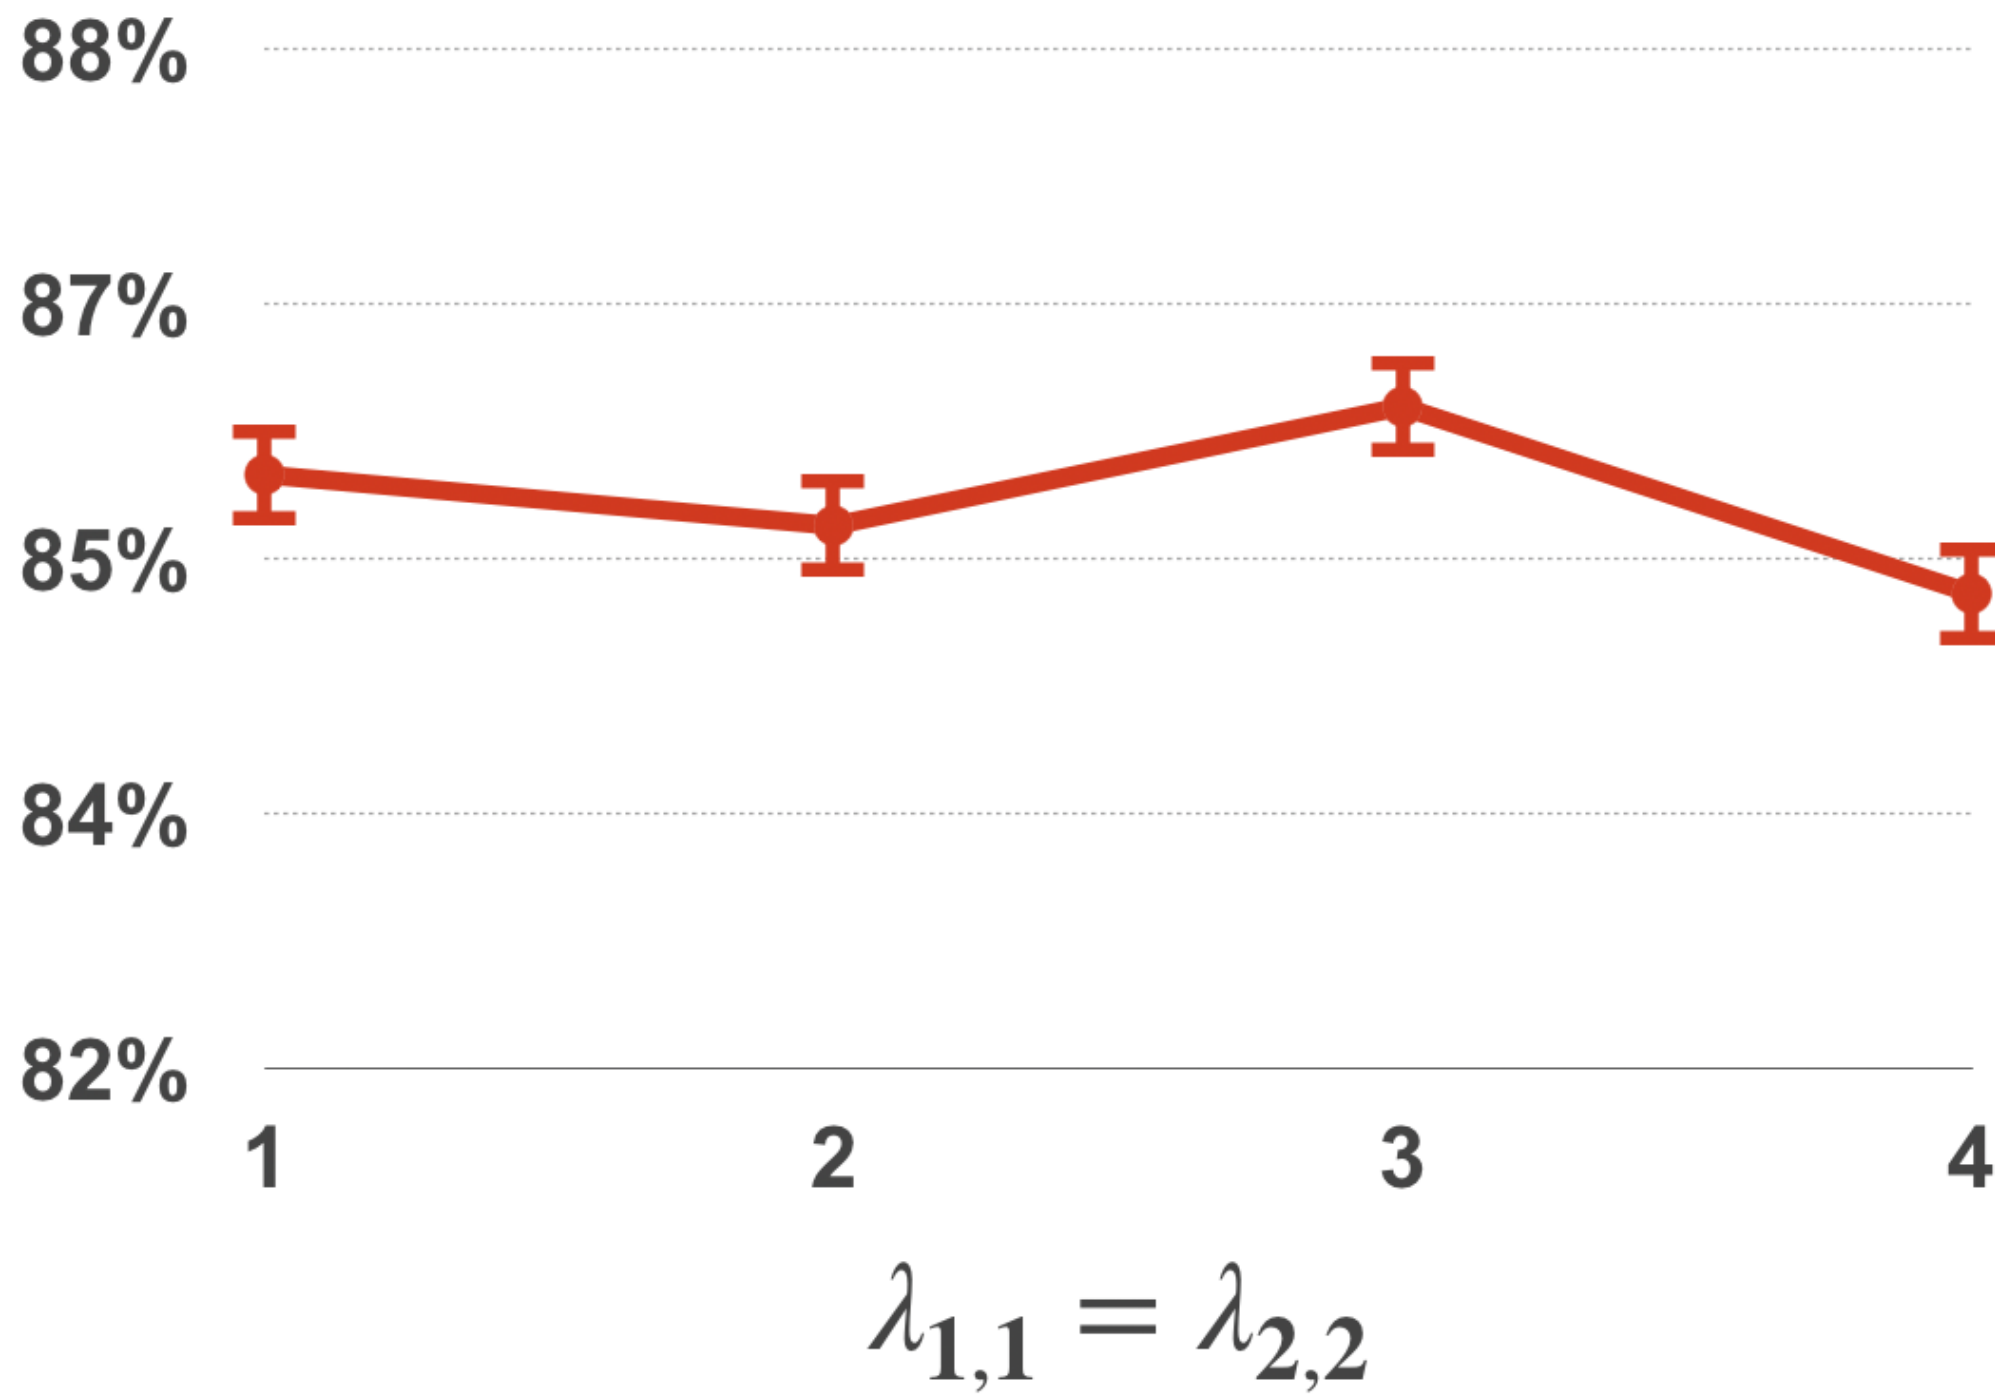

Supplement: Supplementary file 7 [file 123610409-supp.zip]

# UNK

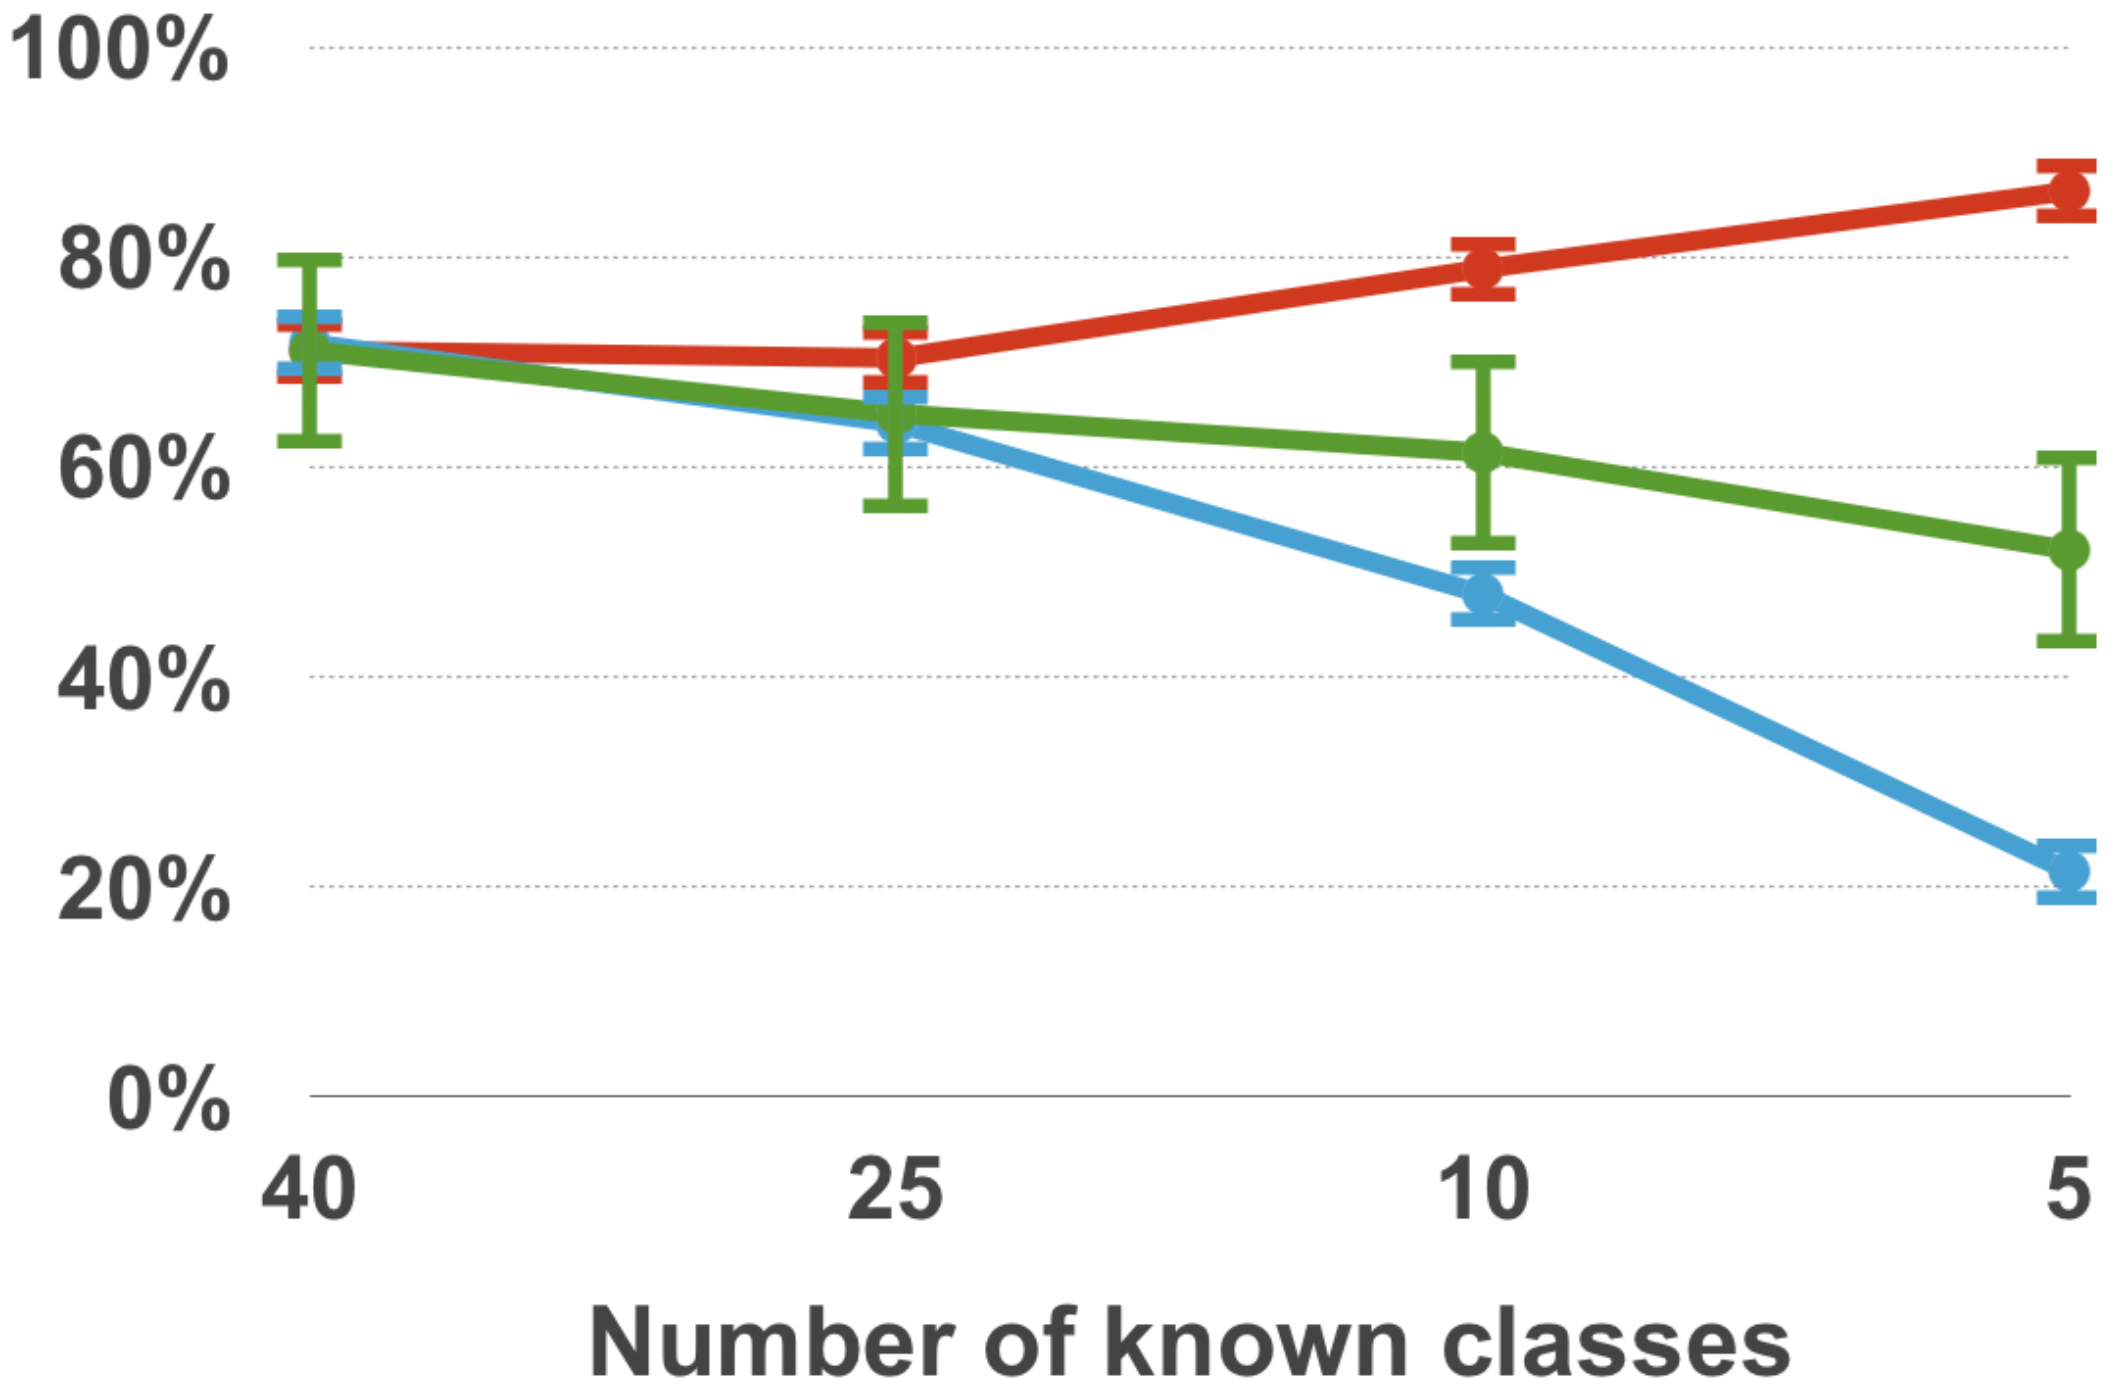

Supplement: Supplementary file 8 [file 123610409-supp.zip]
